# Supplementary material for: Jupyter and Galaxy: Easing entry barriers into complex data analyses for biomedical researchers
Source: PubMed Central journal article supplement (PMC5444614; doi:10.1371/journal.pcbi.1005425), 2017-05-25

## A. Create Galaxy account

If you do not have Galaxy account — create one. If you do — log in.

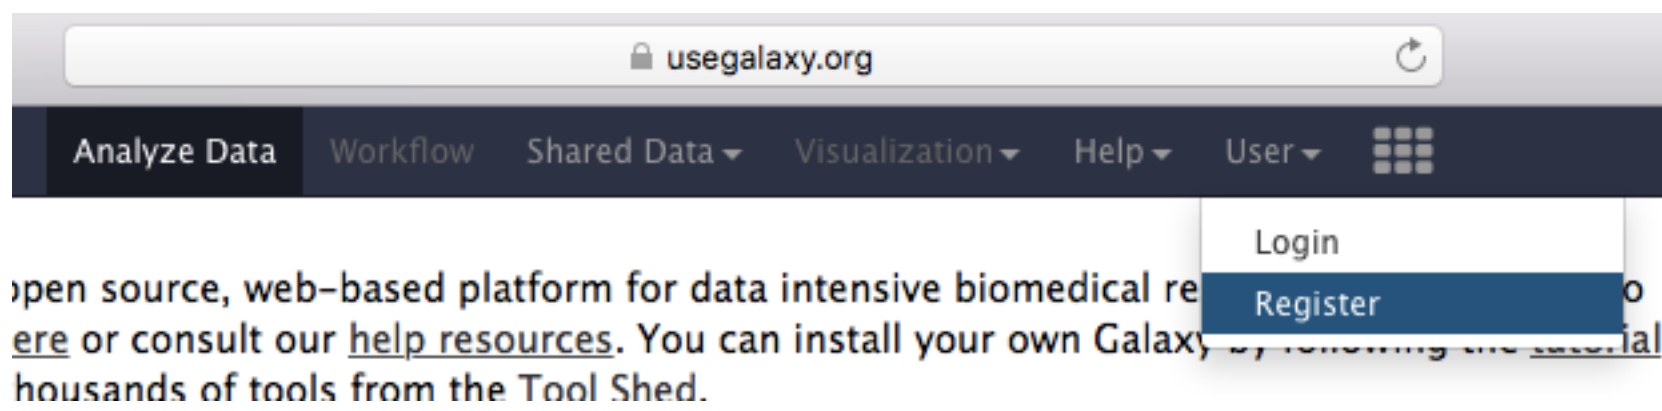

## B. Open the link and import history

Click the link or copy it into your browser's location bar (e.g., [bit.ly/ie-hiv](https://bit.ly/ie-hiv)). When page loads you will see the "import history" link. Click on it:

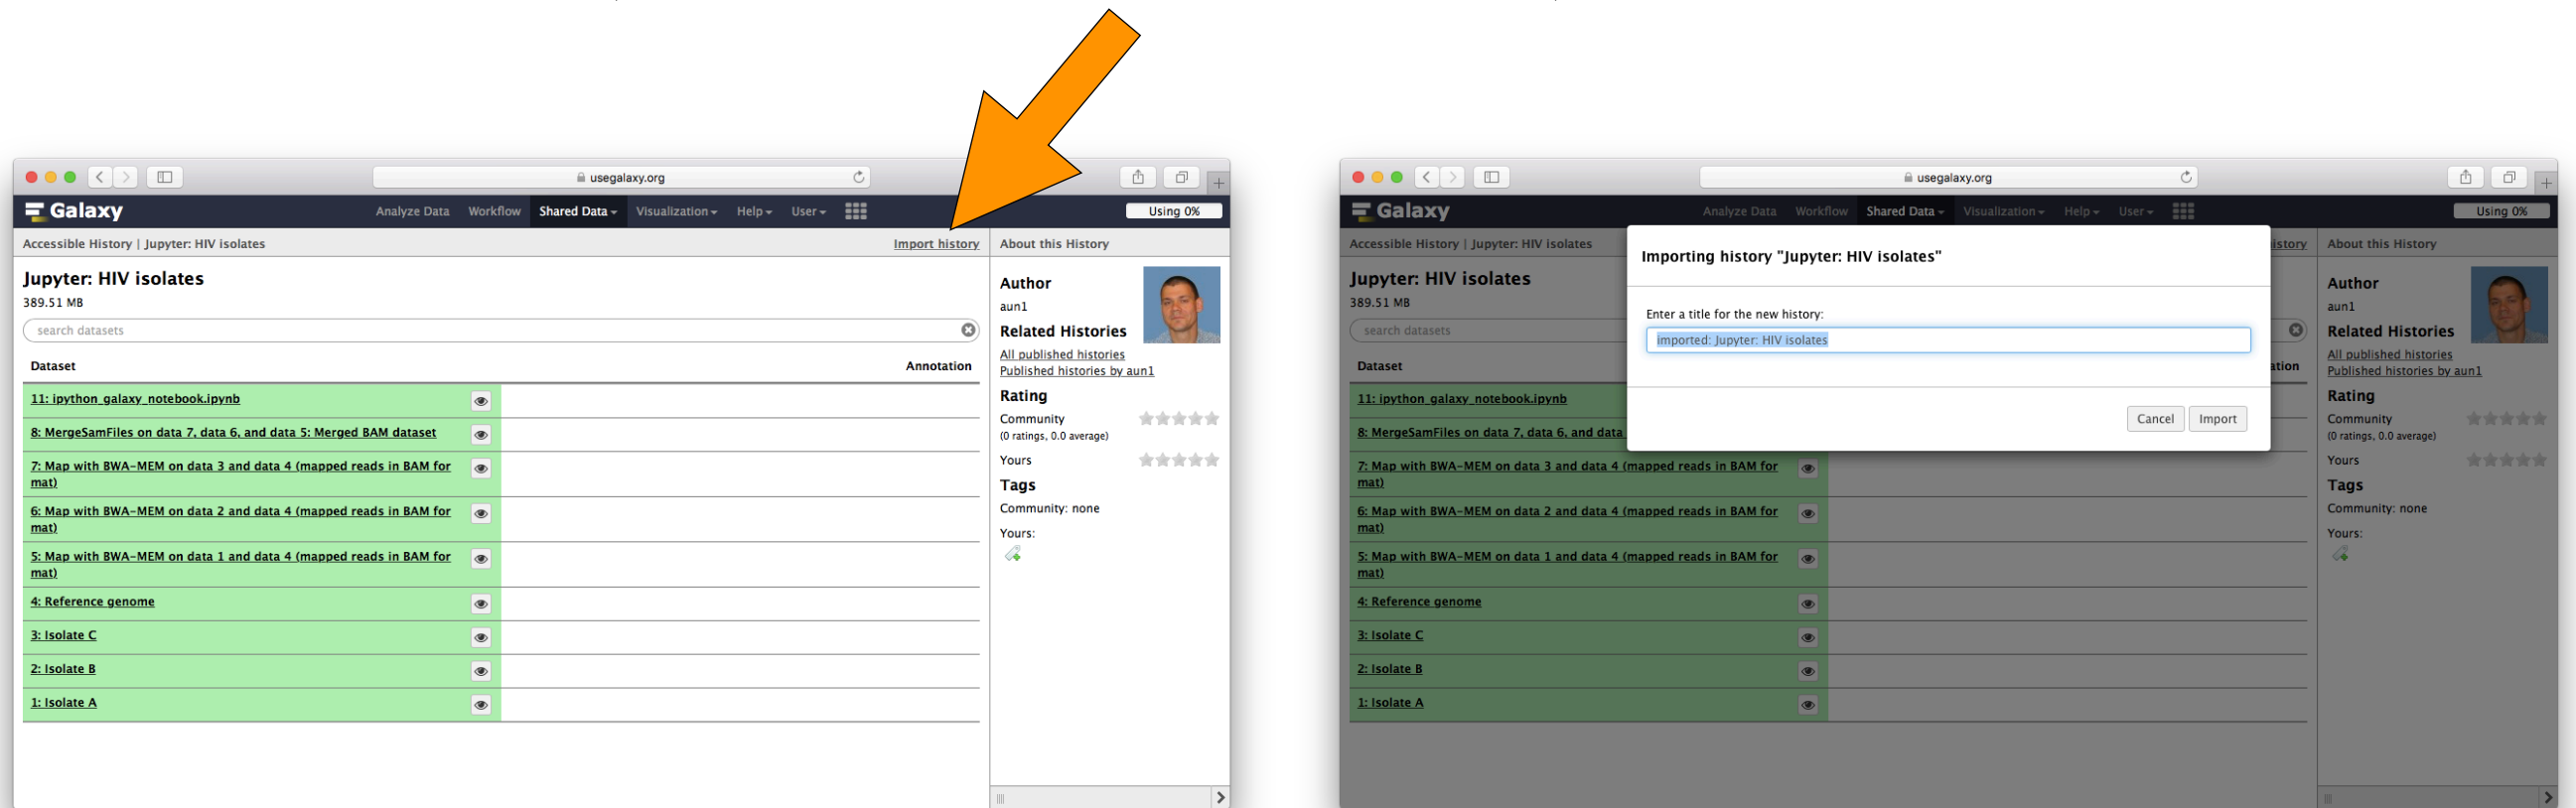

## C. Start Jupyter

Once history is imported locate iPython/Jupyter dataset and expand it by clicking on it. Mouse over "Visualize" button and click "Jupyter" link:

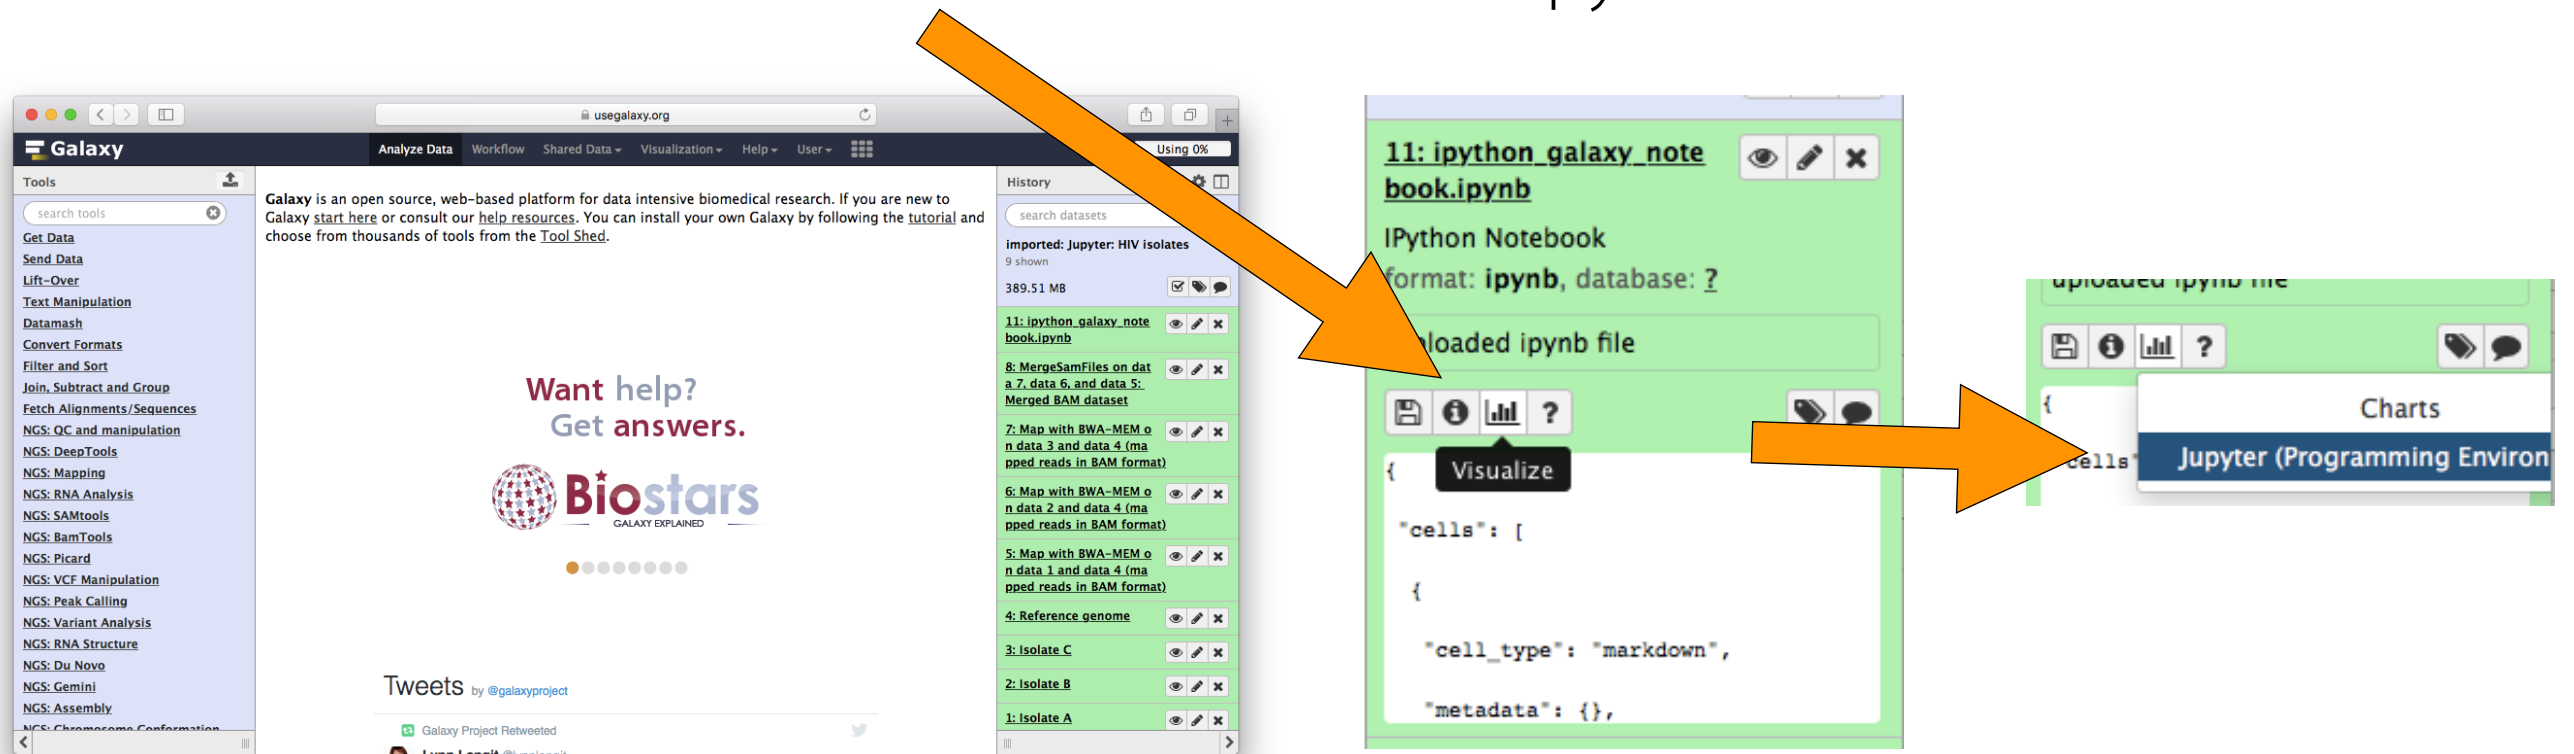

## D. Instantiate Jupyter

Jupyter will start and you will be able to use the notebook. Questions? Use <https://biostar.usegalaxy.org/> for get help.

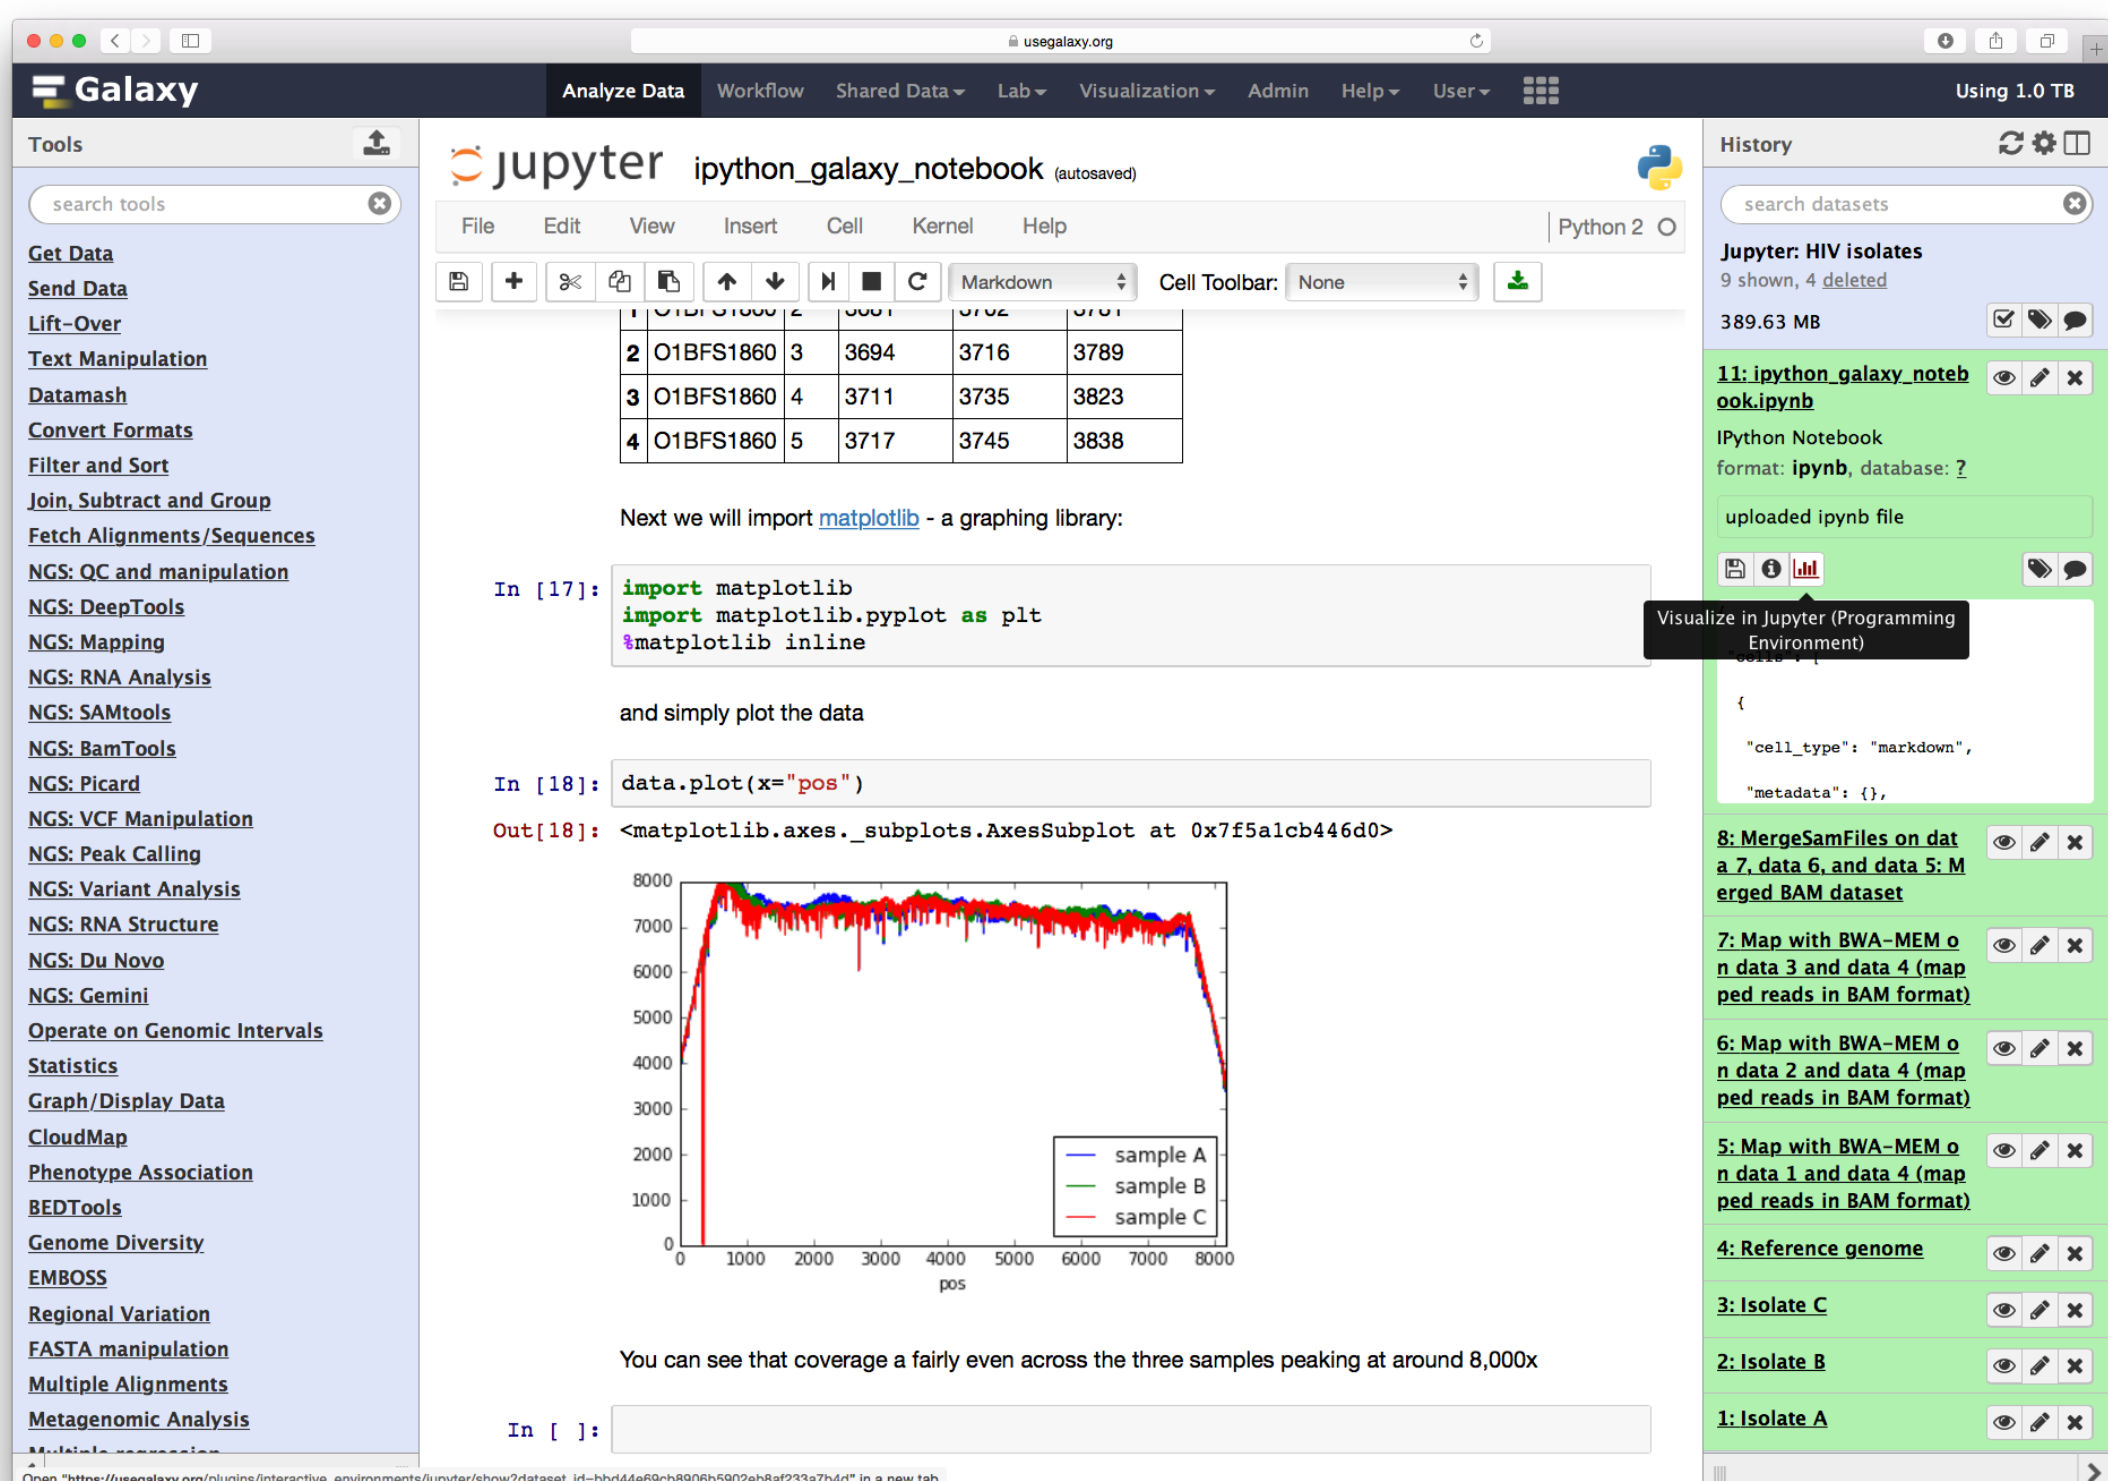

Supplement: pcbi.1005425.s001.pdf [file pcbi.1005425.s001.pdf]
