# Supplementary material for: Jupyter and Galaxy: Easing entry barriers into complex data analyses for biomedical researchers
Source: PubMed Central journal article supplement (PMC5444614; doi:10.1371/journal.pcbi.1005425), 2017-05-25
Supplement: pcbi.1005425.s002.pdf [file pcbi.1005425.s002.pdf]

# ipython\_galaxy\_notebook

August 30, 2016

## 1 An interactive Galaxy Jupyter Notebook: Plotting read coverage distribution from a BAM file

You can access your data via the dataset number. For example, `handle = open(get(42), 'r')`. To save data, write your data to a file, and then call `put('filename.txt')`. The dataset will then be available in your galaxy history. Notebooks can be saved to Galaxy by clicking the large green button at the top right of the IPython interface. More help and informations can be found on the project [website](#).

### 1.1 Getting data in

After starting Jupyter session we are copying a dataset from Galaxy history space into Jupyter space. In this particular case the dataset we need have number 8 in Galaxy's history. We set `bam_file` to 8.

**If you want to use a different dataset as input -> replace 8 with the number of that dataset**

```
In [1]: bam_file = 8
```

```
In [2]: get(bam_file)
```

```
Out[2]: '/import/8'
```

### 1.2 Renaming dataset

`get` command names files using their galaxy history id. This is not a very meaningful name. So we will use UNIX command `mv` to give this file a different name: `hiv_mapping.bam` (here `!` is used to tell Jupyter that we want to execute a shell command):

```
In [3]: !mv {bam_file} hiv_mapping.bam
```

### 1.3 Configuring bioconda

The easiest way to compute the depth of sequencing coverage is with `samtools`. However, they need to be installed. In turn, the easiest way to install `samtools` is with `conda` - a new generation package manager system. Here we are configuring `conda`'s biological software channel [bioconda](#)

```
In [4]: !conda config --add channels bioconda
```

```
Warning: 'bioconda' already in 'channels' list, moving to the front
```

### 1.4 Installing samtools

And once `conda` is configured installing `samtools` is as easy as this (note the `-y` option required here):

```
In [5]: !conda install -y samtools
```

```
Fetching package metadata ...
Solving package specifications: ...
```

Package plan for installation in environment /opt/conda:

The following packages will be downloaded:

| package         | build  |       |
|-----------------|--------|-------|
| conda-env-2.5.2 | py34_0 | 27 KB |

The following packages will be UPDATED:

```
conda-env: 2.5.1-py34_0 --> 2.5.2-py34_0
```

```

Fetching packages ...
conda-env-2.5. 100% |#####| Time: 0:00:00 274.92 kB/s
Extracting packages ...
[ COMPLETE ] |#####| 100%
Unlinking packages ...
[ COMPLETE ] |#####| 100%
Linking packages ...
[ COMPLETE ] |#####| 100%
```

## 1.5 Split bam file on readgroups

In this example the bam file combines mapped reads derived from three different experiments. The relationship between each read and a corresponding sample is maintained with [read group tags](#). Since we want to compute depth of coverage for each sample separately, we first need to split the original bam file into by read groups. This is done using `samtools split` command:

```
In [6]: !samtools split hiv_mapping.bam
```

Listing files will show three newly generated datasets called `hiv_mapping_0`, `1`, and `2`:

```
In [7]: !ls
```

```

9          hiv_mapping_1.bam          readgroup_1.cvr
all_cvr.txt      hiv_mapping_2.bam          readgroup_2.cvr
hiv_mapping.bam  ipython_galaxy_notebook.ipynb
hiv_mapping_0.bam readgroup_0.cvr
```

## 1.6 Computing coverage

We compute coverage using `samtools depth` command. Note how Python's `for` loop is used here. It iterates over three numbers (0, 1, and 2) generated by the `range` function. There are substituted into file names. This way we generate three coverage files (one for each read group) in one go.

Of particular importance is the use of `-a` option when we compute depth. Because of this flag `samtools depth` outputs depth at every position even is the coverage at that position is 0. This would allow us to paste the three datasets side by side making sure that every row described the same position of the reference genome.

**If your dataset has a different number of read groups -> replace 3 within the `range()` function with that number**

```
In [8]: for item in range(3):
        !samtools depth -a hiv_mapping_{item}.bam > readgroup_{item}.cvr
```

Listing files shows three additional datasets (ending with `cvrg` that we have just generated):

```
In [9]: !ls
```

```
9          hiv_mapping_1.bam          readgroup_1.cvrg
all_cvrg.txt      hiv_mapping_2.bam      readgroup_2.cvrg
hiv_mapping.bam  ipython_galaxy_notebook.ipynb
hiv_mapping_0.bam readgroup_0.cvrg
```

Now we can paste these three files side by side removing duplicate columns using UNIX `cut` command:

```
In [10]: !paste readgroup_* | cut -f 1,2,3,6,9 > all_cvrg.txt
```

This new datasets called `all_cvrg.txt` contains five columns (see outputs of `head` and `tail` commands below):

- Reference genome name
- Position in the genome
- Coverage in sample A
- Coverage in sample B
- Coverage in sample C

```
In [11]: !head -n 4 all_cvrg.txt
```

```
01BFS1860      1      3581      3577      3642
01BFS1860      2      3681      3702      3781
01BFS1860      3      3694      3716      3789
01BFS1860      4      3711      3735      3823
```

```
In [12]: !tail -n 4 all_cvrg.txt
```

```
01BFS1860      8159      3486      3524      3585
01BFS1860      8160      3454      3495      3543
01BFS1860      8161      3410      3456      3493
01BFS1860      8162      3383      3428      3476
```

## 1.7 Plotting coverage across the HIV genome

Let's import `pandas` a data manipulation library that allows datasets to be handled in an R-like way:

```
In [13]: import pandas as pd
```

We will then import the `all_cvrg.txt` dataset as Pandas dataframe:

```
In [14]: data = pd.read_table('all_cvrg.txt',header=None)
```

Set column names

```
In [15]: data.columns=["Ref","pos","sample A","sample B","sample C"]
```

And take a look at the result

```
In [16]: data.head()
```

```
Out[16]:
```

|   | Ref       | pos | sample A | sample B | sample C |
|---|-----------|-----|----------|----------|----------|
| 0 | 01BFS1860 | 1   | 3581     | 3577     | 3642     |
| 1 | 01BFS1860 | 2   | 3681     | 3702     | 3781     |
| 2 | 01BFS1860 | 3   | 3694     | 3716     | 3789     |
| 3 | 01BFS1860 | 4   | 3711     | 3735     | 3823     |
| 4 | 01BFS1860 | 5   | 3717     | 3745     | 3838     |

Next we will import `matplotlib` - a graphing library:

```
In [17]: import matplotlib
import matplotlib.pyplot as plt
%matplotlib inline
```

and simply plot the data

```
In [18]: data.plot(x="pos")
```

```
Out[18]: <matplotlib.axes._subplots.AxesSubplot at 0x7f5a1cb446d0>
```

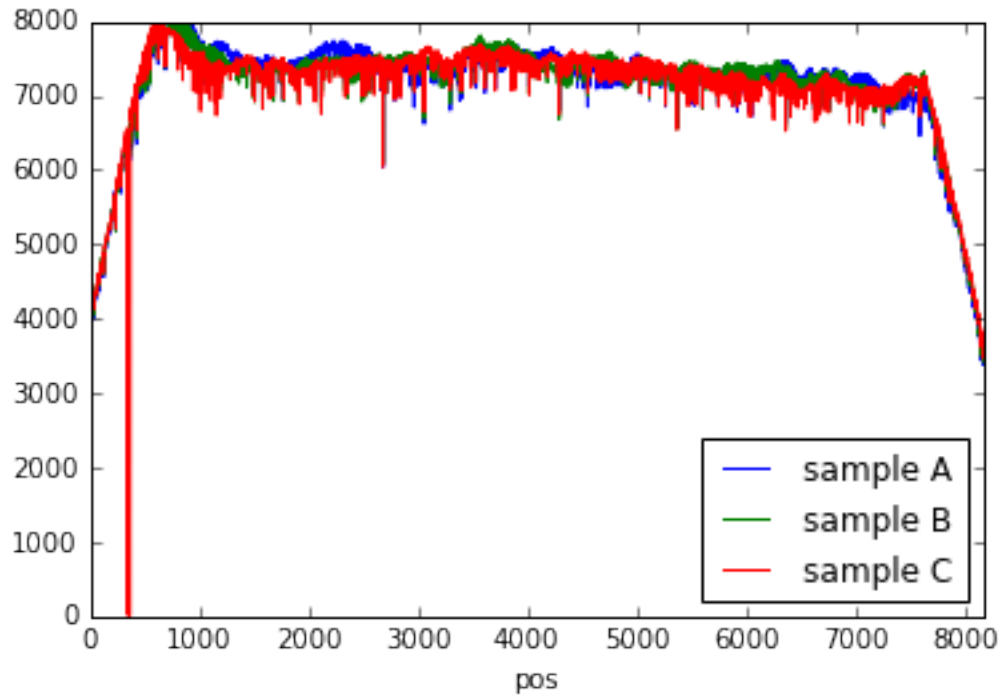

You can see that coverage is fairly even across the three samples peaking at around 8,000x

```
In [ ]:
```
