# Supplementary material for: Jupyter and Galaxy: Easing entry barriers into complex data analyses for biomedical researchers
Source: PubMed Central journal article supplement (PMC5444614; doi:10.1371/journal.pcbi.1005425), 2017-05-25
Supplement: pcbi.1005425.s004.pdf [file pcbi.1005425.s004.pdf]

# ipython\_galaxy\_notebook

August 30, 2016

## 1 Maternal Age Effect and Severe Germline bottleneck in the Inheritance of mitochondrial DNA heteroplasmy

This notebook replicates the analyses shown in Rebolledo-Jaramillo, Su et al (2014) *Maternal Age Effect and Severe Germline bottleneck in the Inheritance of mitochondrial DNA heteroplasmy* **PNAS** **October 28, 2014** **vol. 111 no. 43 15474-15479**

This analysis uses the following datasets as inputs:

- Allele counts produced with Galaxy pipeline (TODO: Provide link to Galaxy history here);
- GenBank file containing sequence and annotation for human mitochondrial genome (accession NC\_012920.1);
- Tab-delimited file of ages for individuals analyzed here
- Known list of problematic sites to be excluded from the analysis

## 2 Define inputs

This notebook requires three input datasets: \* List of variable sites \* List of ages for all individuals \* List of bad sites (see “Define problematic sites and regions” below)

```
In [1]: # Replace '1413' with the number of Galaxy history item
        # containing **Variable sites**
        var_sites = 1413

        # Replace '1414' with the number of Galaxy history item
        # containing **Sample ages**
        ages = 1414

        # Replace '1415' with the number of Galaxy history item
        # containing **Bad sites**
        bad_sites = 1415
```

### 2.1 Import necessary python modules

- `pandas` - A library providing high-performance, easy-to-use data structures and data analysis tools
- `numpy` - A package for scientific computing with Python
- `itertools` - Functions for creation of iterators for efficient looping
- `biopython` - A set of Python modules for biological computation

```
In [2]: import pandas as pd
        import numpy as np
        import itertools
        from Bio import SeqIO
```

```
from Bio.Seq import Seq
from Bio import Entrez
from Bio.Alphabet import IUPAC
```

## 2.2 Load R extensions and install necessary R modules

```
In [3]: # Load R magic, which will allow running R directly in the notebook
        %load_ext rpy2.ipython
```

```
In [4]: # Make a directory where R modules will be installed
        !mkdir R
```

mkdir: cannot create directory 'R': File exists

```
In [5]: %%R
        install.packages("shape", lib="R", repos="http://cran.cnr.berkeley.edu")
```

/opt/conda/envs/python2/lib/python2.7/site-packages/rpy2/robjects/functions.py:106: UserWarning: trying

```
res = super(Function, self).__call__(*new_args, **new_kwargs)
```

/opt/conda/envs/python2/lib/python2.7/site-packages/rpy2/robjects/functions.py:106: UserWarning: Content

```
res = super(Function, self).__call__(*new_args, **new_kwargs)
```

/opt/conda/envs/python2/lib/python2.7/site-packages/rpy2/robjects/functions.py:106: UserWarning: length

```
res = super(Function, self).__call__(*new_args, **new_kwargs)
```

/opt/conda/envs/python2/lib/python2.7/site-packages/rpy2/robjects/functions.py:106: UserWarning: =

```
res = super(Function, self).__call__(*new_args, **new_kwargs)
```

/opt/conda/envs/python2/lib/python2.7/site-packages/rpy2/robjects/functions.py:106: UserWarning:

```
res = super(Function, self).__call__(*new_args, **new_kwargs)
```

/opt/conda/envs/python2/lib/python2.7/site-packages/rpy2/robjects/functions.py:106: UserWarning: downlo

```
res = super(Function, self).__call__(*new_args, **new_kwargs)
```

The downloaded source packages are in  
'/tmp/RtmpZwnpqq/downloaded\_packages'

```
In [6]: %%R
        install.packages("sm", lib="R", repos="http://cran.cnr.berkeley.edu")
```

/opt/conda/envs/python2/lib/python2.7/site-packages/rpy2/robjects/functions.py:106: UserWarning: trying

```
res = super(Function, self).__call__(*new_args, **new_kwargs)
```

/opt/conda/envs/python2/lib/python2.7/site-packages/rpy2/robjects/functions.py:106: UserWarning: length

```
res = super(Function, self).__call__(*new_args, **new_kwargs)
```

/opt/conda/envs/python2/lib/python2.7/site-packages/rpy2/robjects/functions.py:106: UserWarning: downlo

```
res = super(Function, self).__call__(*new_args, **new_kwargs)
```

The downloaded source packages are in  
'/tmp/RtmpZwnpqq/downloaded\_packages'

In [7]: %%R

```
install.packages("vioplot", lib="R", repos="http://cran.cnr.berkeley.edu")
```

/opt/conda/envs/python2/lib/python2.7/site-packages/rpy2/robjects/functions.py:106: UserWarning: trying

```
res = super(Function, self).__call__(*new_args, **new_kwargs)
```

/opt/conda/envs/python2/lib/python2.7/site-packages/rpy2/robjects/functions.py:106: UserWarning: lengt

```
res = super(Function, self).__call__(*new_args, **new_kwargs)
```

/opt/conda/envs/python2/lib/python2.7/site-packages/rpy2/robjects/functions.py:106: UserWarning: downlo

```
res = super(Function, self).__call__(*new_args, **new_kwargs)
```

The downloaded source packages are in  
'/tmp/RtmpZwnpqq/downloaded\_packages'

In [8]: %%R

```
require(shape, lib.loc="R")
```

```
require(sm, lib.loc="R")
```

```
require(vioplot, lib.loc="R")
```

/opt/conda/envs/python2/lib/python2.7/site-packages/rpy2/robjects/functions.py:106: UserWarning: Loading

```
res = super(Function, self).__call__(*new_args, **new_kwargs)
```

/opt/conda/envs/python2/lib/python2.7/site-packages/rpy2/robjects/functions.py:106: UserWarning: Loading

```
res = super(Function, self).__call__(*new_args, **new_kwargs)
```

/opt/conda/envs/python2/lib/python2.7/site-packages/rpy2/robjects/functions.py:106: UserWarning: Packag

```
res = super(Function, self).__call__(*new_args, **new_kwargs)
```

/opt/conda/envs/python2/lib/python2.7/site-packages/rpy2/robjects/functions.py:106: UserWarning: Loading

```
res = super(Function, self).__call__(*new_args, **new_kwargs)
```

## 2.3 Load datasets

In this example all necessary data are located in Galaxy's history. They can be accessed using the `get()` function. For example, to load data in the first history item into Jupyter environment simply use `get(1)`, where 1 is the history item number.

Obviously, if your history looks different, change the numbers in the cells below.

In [9]: # Load Allele Counts

```
with open(get(var_sites)) as ac:  
    first_line = ac.readline()  
    if first_line.startswith("#"):
```

```

df = pd.read_table(ac)
else:
df = pd.read_table(ac,header=None)

# The line below prints the first two lines of the data to give you an idea
df.head(2)

```

Out[9]:

```

      0      1      2      3      4      5      6      7      8      9      10      11      12      13      14  \
0  M117-bl  chrM      2  4343      0      0      0  5955      0      0      0  10298      1  A  .
1  M117-bl  chrM      3      0      0      0  4385      0      0      0  5888  10273      1  T  .

      15      16
0  0.0  .
1  0.0  .

```

In [10]: # Load Genbank file containing mitochondrial genome sequence and annotations  
# See <http://biopython.org/DIST/docs/tutorial/Tutorial.html#htoc55>  
# This loads record with Accession:NC\_012920.1 GI:251831106  
# This cell should return "NC\_012920.1 with 105 features"

```

# Code below loads directly from NCBI but requires Internet connection
# Alternatively you can load this dataset from history using the line below:
# rCRS = SeqIO.read(get(<HISTORY ITEM NUMBER>), "genbank")

Entrez.email = "A.N.Other@example.com"
handle = Entrez.efetch(db="nucleotide", rettype="gb", retmode="text", id="251831106")
rCRS = SeqIO.read(handle, "genbank")
handle.close()
print("%s with %i features" % (rCRS.id, len(rCRS.features)))

```

NC\_012920.1 with 105 features

In [11]: # Load individuals' ages (ages in days)

```

with open(get(ages)) as sa:
    first_line = sa.readline()
    if first_line.startswith("#"):
        sampAges = pd.read_table(sa)
    else:
        sampAges = pd.read_table(sa,header=None)
sampAges.head(2)

```

Out[11]:

```

      0      1      2      3
0  M132  16658  M132C1  7460
1  M137  14294  M137C2  6202

```

## 2.4 Define problematic sites and regions

- Problematic sites are defined as heteroplasmic sites that failed to be validated by experimental means. In particular, there is an additional screening step not shown here, where we calculate the cycle bias of the site, i.e. whether the alternative allele is supported primarily by nucleotides within 25 bp of the read ends. There are 9 such cases, and two additional cases of sites we could not replicate with a new long range PCR (deemed PCR errors). These 11 sites are provided as an input dataset for this analysis.
- Problematic regions include:

- mtDNA homopolymers
- region around the artificial “N” at position 3107
- regions within 50 bp of the long range PCR primers

In [12]: # Read in bad (problematic) sites dataset from history

```
knownBadhqSites = pd.read_table(get(bad_sites),header=None)
```

In [13]: # Define problematic regions

```
mask = [(66,71),(303,311),(514,523),(12418,12425),(16184,16193),
        (3105,3109),(2817,2868),(3320,3370),(10796,10846),(11520,11570)]
```

```
maskRegions = list()
for start,end in mask:
    maskRegions+=range(start,end+1)
```

## 2.5 Prepare data

If a header was present in the allele counts input dataset, Pandas assigned the column names automatically. However we will standardize the column names so they can be easily accessed later.

In [14]: df.columns=["sample","reference","position","A","C","G","T","a","c","g","t","cvrg","nalleles",

In [15]: # Let's take a look at the first two lines in the data frame  
df.head(2)

```
Out[15]:
```

|   | sample  | reference | position | A    | C | G | T    | a    | c | g | t    | cvrg  | \ |
|---|---------|-----------|----------|------|---|---|------|------|---|---|------|-------|---|
| 0 | M117-bl | chrM      | 2        | 4343 | 0 | 0 | 0    | 5955 | 0 | 0 | 0    | 10298 |   |
| 1 | M117-bl | chrM      | 3        | 0    | 0 | 0 | 4385 | 0    | 0 | 0 | 5888 | 10273 |   |

  

|   | nalleles | major | minor | maf | sb |
|---|----------|-------|-------|-----|----|
| 0 | 1        | A     | .     | 0.0 | .  |
| 1 | 1        | T     | .     | 0.0 | .  |

In our data, all but one mother-child pair conforms to the naming convention:

| mother        | child               |
|---------------|---------------------|
| family-tissue | familyChild#-tissue |
| M477-ch       | M477C1-ch           |

However, the pair M502G (grandmother) and M501 (mother) break the rule. So, we adjusted their ids accordingly:

```
In [16]: old = ["M502G-ch", "M502G-bl", "M501-ch", "M501-bl"]
new = ["M502-ch", "M502-bl", "M502C1-ch", "M502C1-bl"]
df.replace(to_replace=old,value=new,inplace=True)
```

## 2.6 Plot sequencing depth distribution (Fig. S7)

At this point we can calculate the coverage distribution of each sample, as shown in Figure S7 in the PNAS paper. To do so, we need to split the dataframe into blood and cheek dataframes, and make the object available to R (via Rpy2).

```
In [17]: # Here we split the dataframe into blood and cheek samples
blood = df[df['sample'].str.contains("-bl")]
cheek = df[df['sample'].str.contains("-ch")]
```

```
In [18]: # Let's look at blood data frame
blood.head(2)
```

```
Out[18]:
```

|   | sample  | reference | position | A    | C | G | T    | a    | c | g | t    | cvrg  |
|---|---------|-----------|----------|------|---|---|------|------|---|---|------|-------|
| 0 | M117-bl | chrM      | 2        | 4343 | 0 | 0 | 0    | 5955 | 0 | 0 | 0    | 10298 |
| 1 | M117-bl | chrM      | 3        | 0    | 0 | 0 | 4385 | 0    | 0 | 0 | 5888 | 10273 |

  

|   | nalleles | major | minor | maf | sb |
|---|----------|-------|-------|-----|----|
| 0 | 1        | A     | .     | 0.0 | .  |
| 1 | 1        | T     | .     | 0.0 | .  |

```
In [19]: # And at the cheek data frame
cheek.head(2)
```

```
Out[19]:
```

|       | sample  | reference | position | A    | C | G    | T | a    | c | g    | t | cvrg |
|-------|---------|-----------|----------|------|---|------|---|------|---|------|---|------|
| 16560 | M117-ch | chrM      | 1        | 0    | 0 | 1829 | 0 | 0    | 0 | 3239 | 0 | 5068 |
| 16561 | M117-ch | chrM      | 2        | 1829 | 0 | 0    | 0 | 3291 | 0 | 0    | 0 | 5120 |

  

|       | nalleles | major | minor | maf | sb |
|-------|----------|-------|-------|-----|----|
| 16560 | 1        | G     | .     | 0.0 | .  |
| 16561 | 1        | A     | .     | 0.0 | .  |

```
In [20]: # Use Rmagic to load data into R using the -i flag
# This step will take a bit (~2 min)
```

```
%R -i cheek,blood
```

Let's peek at the R version of the blood dataframe:

```
In [21]: %%R
```

```
head(blood,2)
```

```
sample reference position A C G T a c g t cvrg nalleles major
0 M117-bl chrM 2 4343 0 0 0 5955 0 0 0 10298 1 A
1 M117-bl chrM 3 0 0 0 4385 0 0 0 5888 10273 1 T
minor maf sb
0 . 0 .
1 . 0 .
```

Transform numeric looking columns into actual numeric columns to guarantee the value types:

```
In [22]: %%R
```

```
tonumeric = c(3:13,16)
```

```
blood[,tonumeric] = apply(blood[,tonumeric], 2, function(x) as.numeric(as.character(x)))
```

```
cheek[,tonumeric] = apply(cheek[,tonumeric], 2, function(x) as.numeric(as.character(x)))
```

Define custom R function to generate **Figure S7**:

```
In [23]: %%R
```

```
boxPlotCvrg = function(data,tissue){
```

```

names = sort(unique(data[["sample"]]))
data[["sample"]] = factor(data[["sample"]],levels=names)

boxplot(log10(cvrg)~sample,data=data,whisklty="solid",outline=F,
        whisklwd=0.5,boxlwd=1,medlwd=1,medcol="red",main="",
        ylab="log10(coverage)",bty="n",frame=F,boxcol="white",
        boxfill="black",medlwd=3,whiskcol="grey",staplecol="grey",ylim=c(2,6))

mtext(tissue,adj=0,side=3,las=1,at=length(names)/2,font=2,cex=1.25)
}

```

### 2.6.1 Plot the figure

You can adjust the size of the plotting image by adjusting:

- -w = width
- -h = height
- -u = units
- -r = resolution

In [24]: `%%R -w 18 -h 10 -u in -r 72`

```

par(las=2)
par(mar=c(4,4,4,1))
par(oma=c(2,2,0,0))
par(mfrow=c(2,1))
par(cex.lab=1.25)
par(cex.axis=0.75)

```

```

boxPlotCvrg(cheek,"cheek")
boxPlotCvrg(blood,"blood")

```

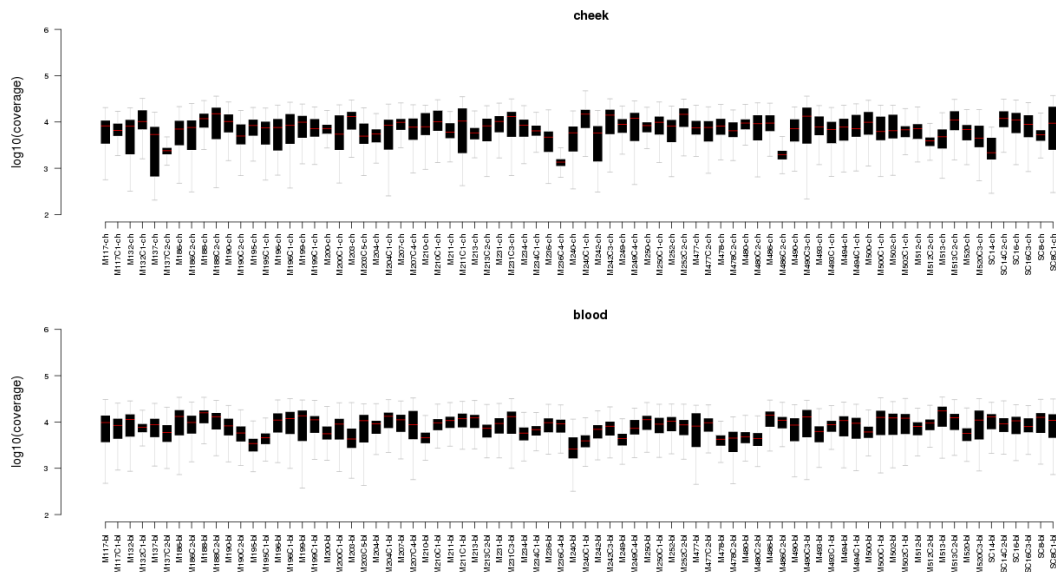

## 2.7 Define high quality heteroplasmic sites

We define high quality (HQ) sites as:

1. minor allele frequency (maf)  $\geq$  1%
2. coverage  $\geq$  1000
3. maf balance (1% in forward and reverse strands)
4. no strand bias
5. outside “problematic sites”:
  - mtDNA homopolymeres
  - around the artificial “N” at position 3107
  - within 50 bp of the long range PCR primers

```
In [25]: # Filter sites on minor allele frequency (maf), coverage (cvrg) and wheather
# the sites are located in problematic regions
# The list of problematic region (maskRegions) is defined in cell 12 above
hq_sites = df[(df.maf>=0.01) & (df.cvrg>=1000) & ~df.position.isin(maskRegions)]
```

```
In [26]: len(hq_sites)
```

```
Out[26]: 559
```

By applying these initial filters, we reduced the dataframe from ~2 million lines to **572** lines only, which is much more manageable. Next, we calculate strand bias and maf balance for these 572 sites. The strand bias calculation is performed according to Guo Y et al. [2012](#)

```
In [27]: # Compute strand and minor allele frequency bias
```

```
def strand_stats(x, mafThreshold=0.01):
    falleles = ['A','C','G','T']
    ralleles = ['a','c','g','t']
    sample,position,major,minor,coverage,maf = x[['sample','position','major','minor','coverage','maf']]
    fcounts = x[falleles]
    rcounts = x[ralleles]
    if minor!='.':
        index_major = falleles.index(major)
        index_minor = falleles.index(minor)

        fcount_minor = float(fcounts[index_minor])
        ftotal = fcount_minor + fcounts[index_major]

        rcount_minor = float(rcounts[index_minor])
        rttotal = rcount_minor + rcounts[index_major]

        minor_total = float(fcount_minor + rcount_minor)
        site_total = ftotal + rttotal

    try:
        strandBias = abs( (fcount_minor/ftotal) - (rcount_minor/rttotal) ) / (minor_total/site_total)
    except:
        strandBias = np.nan

    try:
        maf_frwd = fcount_minor/sum(fcounts)
    except:
```



```

        maf_frwd = np.nan
    try:
        maf_rvrs = rcount_minor/sum(rcounts)
    except:
        maf_rvrs = np.nan

    if (maf_frwd>=mafThreshold) and (maf_rvrs>=mafThreshold):
        mafBalance = 1
    else:
        mafBalance = 0

    else:
        strandBias = float(2)
        mafBalance = 0

    return pd.Series([strandBias,mafBalance])

```

In [28]: # Apply strand calculations to the data

```

biasCols = hq_sites.apply(strand_stats,axis=1,args=(0.01,))
biasCols.columns = ["strandBias","mafBalance"]
hq_sites = pd.concat([hq_sites,biasCols],axis=1)

```

In [29]: # Filter on strand and maf balance

```

hq_sites = hq_sites[(hq_sites.strandBias<=1) & (hq_sites.mafBalance==1) ]
len(hq_sites)

```

Out[29]: 190

In [30]: # Set bad sites column names

```

knownBadhqSites.columns=["sample","position"]

# Adjust naming convention for the anomalous grandmother-mother pair
knownBadhqSites.replace(to_replace=old,value=new,inplace=True)

# Transform bad sites into a hashable object
bad = set(knownBadhqSites.itertuples(index=False))

# Get a boolean array to filter high quality sites
good = [x not in bad for x in hq_sites[['sample','position']].itertuples(index=False)]

# Finally, filter high quality sites
hq_sites = hq_sites[good]

```

In [31]: len(hq\_sites)

```

#hq_sites.to_csv("hq173.txt",sep="\t",index=False)

```

Out[31]: 181

## 2.8 Test statistical significance of high quality sites

Finally, we calculate the significance of the minor allele frequency of a site provided the error rate at that position. The error rate is estimated from the remaining 155 samples, and the expected allele accounts are compared to the observed allele counts:

In [32]: from scipy.stats import poisson

```
In [33]: # We define a poisson function that will take a single high quality site, and explore the vari
# the position among the remaining samples
```

```
def poisson_pval(current_df, sample):
    alleles = ['A', 'C', 'G', 'T', 'a', 'c', 'g', 't']

    sample_counts = list(current_df.loc[current_df['sample']==sample, alleles].iloc[0,:])
    others_counts = list(current_df.loc[current_df['sample']!=sample, alleles].apply(sum,axis=
sample_coverage = sum(sample_counts)

    observed_error = (sum(others_counts) - max(others_counts))/float(sum(others_counts))
    sample_nonMajor_counts = int(sample_coverage - max(sample_counts))

    pvalue = poisson.pmf(sample_nonMajor_counts, observed_error*sample_coverage)

    return pvalue
```

```
In [34]: poisson_pvalues = []
```

```
for sample, position in hq_sites[["sample", "position"]].itertuples(index=False):
    poisson_pvalues.append(poisson_pval(df[df['position']==position], sample))

hq_sites["poisson"] = poisson_pvalues
hq_sites = hq_sites[hq_sites.poisson<=0.05]
len(hq_sites)
```

```
Out[34]: 181
```

As described in the paper, all sites were statistically significant under the Poisson and Likelihood (not shown here) frameworks.

### 3 Screening for contamination

In our previous publication, Dickins, Rebolledo-Jaramillo, et al (2014) Controlling for contamination in resequencing studies with a reproducible web-based phylogenetic approach [BioTechniques, 56\(3\):134–141](#), we described warning signs of a potential contamination. They include: 1. Excess heteroplasmic sites ( $\geq 5$  per sample) 2. Tight minor allele frequency distribution 3. Non-family related positions of heteroplasmic sites

We routinely apply our contamination detection pipeline, so we are confident our sites in the PNAS paper were not artifacts. As an example of the screening for contamination, we can plot the number of sites and the minor allele frequency distribution of all samples in the high quality sites set:

```
In [35]: # Make R aware of the hq_sites dataframe
%R -i hq_sites
```

```
In [36]: %%R
```

```
# Adjust value types in the hq_sites dataframe

tonumeric = c(3:13,16:18)
hq_sites[,tonumeric] = apply(hq_sites[,tonumeric], 2, function(x) as.numeric(as.character(x)))
head(hq_sites,2)
```

|       | sample    | reference | position | A       | C       | G          | T          | a       | c            | g  | t    | cvr  |
|-------|-----------|-----------|----------|---------|---------|------------|------------|---------|--------------|----|------|------|
| 49743 | M117C1-ch | chrM      | 214      | 1234    | 0       | 22         | 0          | 1581    | 0            | 36 | 0    | 2873 |
| 80535 | M132-bl   | chrM      | 14461    | 0       | 195     | 0          | 4356       | 0       | 183          | 0  | 4620 | 9354 |
|       | nalleles  | major     | minor    | maf     | sb      | strandBias | mafBalance | poisson |              |    |      |      |
| 49743 | 2         | A         | G        | 0.02019 | 0.23517 | 0.2351663  |            | 1       | 1.109776e-02 |    |      |      |
| 80535 | 2         | T         | C        | 0.04041 | 0.11746 | 0.1174580  |            | 1       | 4.761880e-06 |    |      |      |

```
In [37]: %%R -w 10 -h 15 -u in -r 72
```

```
# Plot hq_sites number of sites and minor allele frequency distribution
```

```
par(mar=c(4,15,4,0))
boxplot(
  maf~sample,
  data=hq_sites,
  pch=16,cex=0.75,
  outcol="azure3",outline=T,
  whisklty=1,whiskwd=1.5,
  staplelwd=1.5,
  boxwex=0.75,boxcol="white",boxfill="cornflowerblue",
  horizontal=T,cex.axis=0.75,las=2,
  frame=F,xaxt="n",ylim=c(-0.01,0.5)
)

axis(1,at=seq(0,5,0.5)/10,lab=100*(seq(0,5,0.5)/10),cex.axis=0.75)
title(xlab="minor allele frequency (%)",line=2.5,cex.axis=0.75)

nsites = table(hq_sites[["sample"]])
for (i in 1:length(nsites)){
  text(-0.01,i,lab=nsites[i],cex=0.75)
}
mtext("Nsites:",side=3,line=-2,at=0,adj=1.25)
```

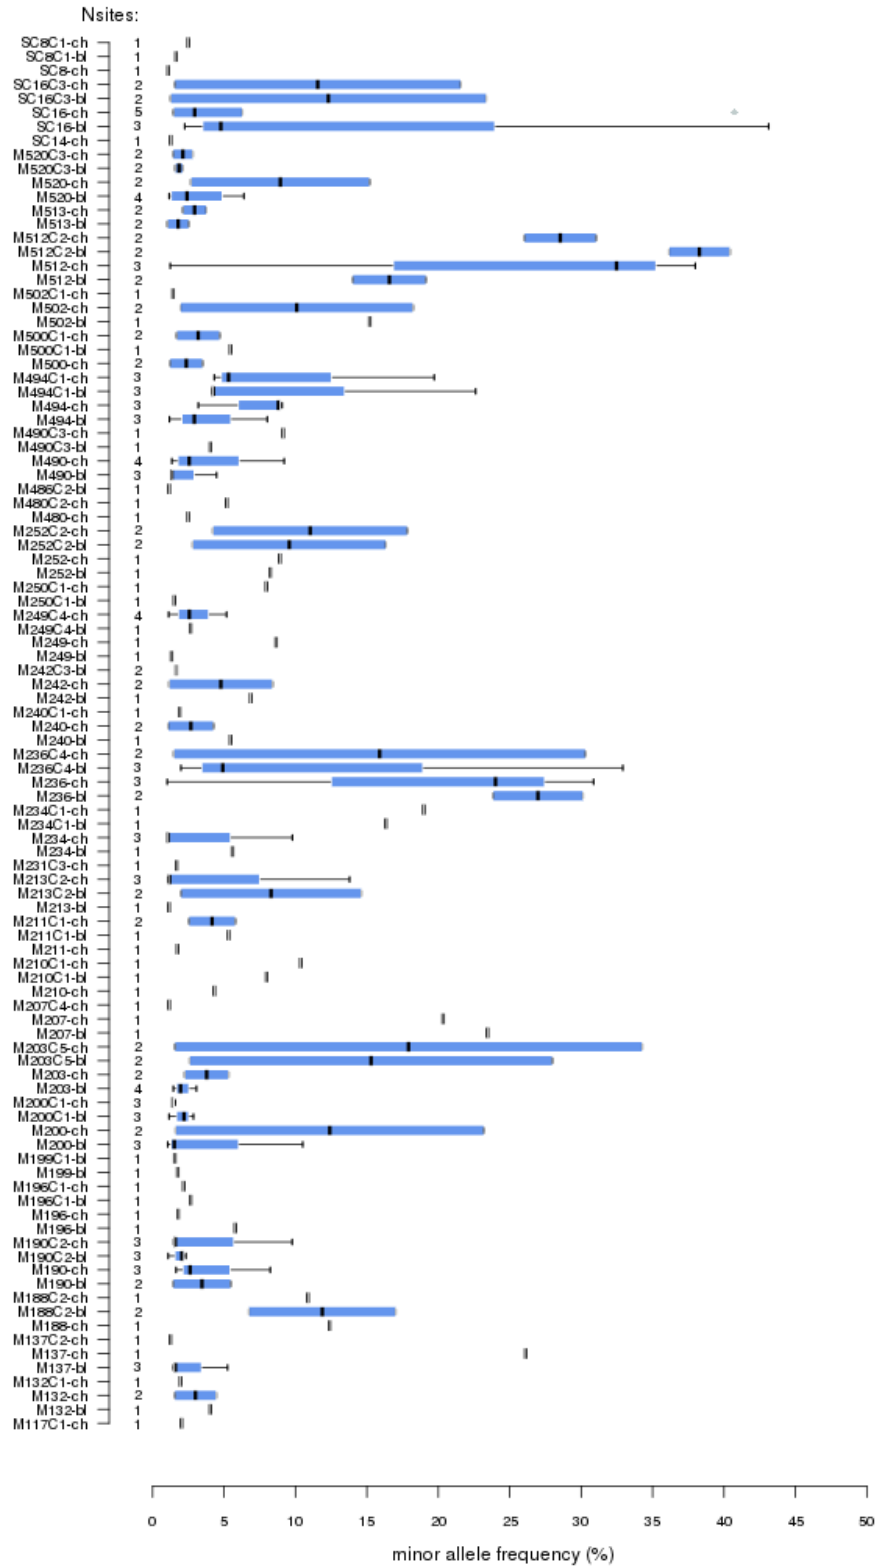

### 3.1 Placing high quality sites into *quartets*

For each high quality site, we can retrieve the minor allele frequency information for the remaining 3 samples in the family collection. So, a quartet is simply a tabulation of the minor allele frequency for the mother blood and cheek, and her child blood and cheek, for the same site. Below is an example of a quartet for family **M494**:

| family | position | major | minor | mother_cheek | mother_blood | child_cheek | child_blood |
|--------|----------|-------|-------|--------------|--------------|-------------|-------------|
| M494   | 9196     | G     | A     | 0.032        | 0.030        | 0.000       | 0.000       |

However, before we can do that, we need to add family information to the high quality sites. We will do that by extracting the family id from each sample's id. It is also useful to have a way to split the data by tissue or member of the pair, so we will add the columns `family`, `tissue` and `member`, accordingly.

```
In [38]: # Get family id from sample id
         # i.e. M512C1-ch returns M512

def getfamlabels(samplename):
    nameparts = [".".join(x) for _, x in itertools.groupby(samplename, key=str.isdigit)]
    family = ".".join(nameparts[:2])
    if "-ch" in nameparts:
        tissue = "cheek"
    else:
        tissue = "blood"

    if len(nameparts)>3:
        pairclass = "child"
    else:
        pairclass = "mother"

    return pd.Series([family,tissue,pairclass])
```

```
In [39]: # Apply the above function to the data

hq_sites[["family","tissue","member"]] = hq_sites["sample"].apply(getfamlabels)
```

```
In [40]: hq_sites.head(2)
```

```
Out[40]:
```

|       | sample    | reference | position | A    | C   | G  | T    | a    | c   | g  | \ |
|-------|-----------|-----------|----------|------|-----|----|------|------|-----|----|---|
| 49743 | M117C1-ch | chrM      | 214      | 1234 | 0   | 22 | 0    | 1581 | 0   | 36 |   |
| 80535 | M132-bl   | chrM      | 14461    | 0    | 195 | 0  | 4356 | 0    | 183 | 0  |   |

  

|       | major | minor | maf | sb      | strandBias | mafBalance | \   |
|-------|-------|-------|-----|---------|------------|------------|-----|
| 49743 | ...   | A     | G   | 0.02019 | 0.23517    | 0.235166   | 1.0 |
| 80535 | ...   | T     | C   | 0.04041 | 0.11746    | 0.117458   | 1.0 |

  

|       | poisson  | family | tissue | member |
|-------|----------|--------|--------|--------|
| 49743 | 0.011098 | M117   | cheek  | child  |
| 80535 | 0.000005 | M132   | blood  | mother |

[2 rows x 23 columns]

```
In [41]: # Now we can extract the unique quartets by selecting the "family" and "position" columns
```

```
unique_quartets = hq_sites[["family","position"]].drop_duplicates()
len(unique_quartets)
```

```
Out[41]: 108
```

```
In [42]: unique_quartets.head(2)
```

```
Out[42]:      family  position
49743    M117      214
80535    M132     14461
```

```
In [43]: # For each family_id/position combination,
# retrieve the information for all 4 members of the quartets
# from the original data dataframe
```

```
def getQuartets(hqsite):
    position = hqsite['position']
    familyid = hqsite['family']
    pos_data = df[df['position'] == position]
    allmembers = [s for s in pos_data['sample'].drop_duplicates() if s.startswith(familyid)]
    mother = min([len(x) for x in allmembers])
    child = max([len(x) for x in allmembers])
    if len(allmembers) == 4:

        for member in allmembers:
            if len(member)==mother and member.endswith("-ch"):
                motherCheek = df[(df['sample']==member) & (df['position']==position)][['major',
                elif len(member)==mother and member.endswith("-bl"):
                motherBlood = df[(df['sample']==member) & (df['position']==position)][['major',
                elif len(member)==child and member.endswith("-ch"):
                childCheek = df[(df['sample']==member) & (df['position']==position)][['major',
            else:
                childBlood = df[(df['sample']==member) & (df['position']==position)][['major',

        return pd.Series([familyid,position]+list(motherCheek)+list(motherBlood)+list(childCheek)
    else:
        pass
```

```
In [44]: # Apply getQuartets to data
```

```
quartets = unique_quartets.apply(getQuartets,axis=1)
```

```
In [45]: # The following is necessary to remove empty rows from the dataframe
```

```
quartets = quartets.dropna()
```

```
In [46]: quartets
```

```
Out[46]:      0      1  2  3      4  5  6      7  8  9      10 11 12 \
49743    M117    214.0  A  G  0.00181  A  G  0.00043  A  G  0.02019  A  G
80535    M132  14461.0  T  C  0.04461  T  C  0.04041  T  C  0.00145  T  C
82828    M132    185.0  A  G  0.01535  A  G  0.00569  A  G  0.00522  A  G
```

|         |      |         |     |     |         |     |     |         |     |     |         |     |     |
|---------|------|---------|-----|-----|---------|-----|-----|---------|-----|-----|---------|-----|-----|
| 115798  | M132 | 64.0    | C   | T   | 0.00307 | C   | T   | 0.00030 | C   | T   | 0.01945 | C   | T   |
| 140360  | M137 | 8953.0  | A   | .   | 0.00000 | A   | G   | 0.01451 | A   | T   | 0.00037 | A   | .   |
| 145325  | M137 | 13918.0 | T   | C   | 0.00105 | T   | C   | 0.01591 | T   | .   | 0.00000 | T   | .   |
| 147727  | M137 | 16320.0 | C   | T   | 0.26120 | C   | T   | 0.05245 | C   | .   | 0.00000 | C   | T   |
| 191703  | M137 | 11054.0 | C   | T   | 0.00018 | C   | .   | 0.00000 | C   | T   | 0.01242 | C   | T   |
| 308891  | M188 | 16240.0 | A   | G   | 0.00103 | A   | G   | 0.00007 | A   | G   | 0.10872 | A   | G   |
| 328908  | M190 | 3202.0  | T   | C   | 0.01641 | T   | C   | 0.01420 | T   | C   | 0.00043 | T   | C   |
| 330811  | M190 | 5105.0  | T   | C   | 0.02625 | T   | C   | 0.05490 | T   | .   | 0.00000 | T   | .   |
| 342450  | M190 | 215.0   | A   | G   | 0.08234 | A   | G   | 0.00097 | A   | G   | 0.00122 | A   | .   |
| 365134  | M190 | 6379.0  | T   | .   | 0.00000 | T   | C   | 0.00056 | T   | C   | 0.01585 | T   | C   |
| 366061  | M190 | 7306.0  | T   | C   | 0.00032 | T   | C   | 0.00049 | T   | C   | 0.01473 | T   | C   |
| 375236  | M190 | 16482.0 | A   | G   | 0.00153 | A   | G   | 0.00033 | A   | G   | 0.09767 | A   | G   |
| 474020  | M196 | 16172.0 | T   | C   | 0.01780 | T   | C   | 0.05783 | T   | C   | 0.00048 | T   | C   |
| 507120  | M196 | 16274.0 | G   | A   | 0.00021 | G   | A   | 0.00038 | G   | A   | 0.02176 | G   | A   |
| 539922  | M199 | 16150.0 | C   | T   | 0.00227 | C   | T   | 0.01761 | C   | T   | 0.00020 | C   | T   |
| 558655  | M199 | 1747.0  | G   | T   | 0.00013 | G   | A   | 0.00035 | G   | A   | 0.00015 | G   | A   |
| 589762  | M200 | 596.0   | T   | C   | 0.23206 | T   | C   | 0.10507 | T   | C   | 0.00340 | T   | C   |
| 597746  | M200 | 8584.0  | G   | A   | 0.00541 | G   | A   | 0.01516 | G   | A   | 0.00064 | G   | .   |
| 602733  | M200 | 13571.0 | C   | T   | 0.01600 | C   | T   | 0.01060 | C   | .   | 0.00000 | C   | T   |
| 623866  | M200 | 1598.0  | G   | A   | 0.00124 | G   | A   | 0.00062 | G   | A   | 0.00334 | G   | A   |
| 631050  | M200 | 8784.0  | A   | G   | 0.00046 | A   | G   | 0.00161 | A   | G   | 0.01430 | A   | G   |
| 634146  | M200 | 11881.0 | C   | T   | 0.01271 | C   | T   | 0.01057 | C   | T   | 0.01582 | C   | T   |
| 649833  | M200 | 11012.0 | T   | C   | 0.00145 | T   | C   | 0.00075 | T   | C   | 0.01424 | T   | C   |
| 666023  | M203 | 11825.0 | G   | A   | 0.05327 | G   | A   | 0.03067 | G   | A   | 0.00024 | G   | A   |
| 666180  | M203 | 11982.0 | T   | C   | 0.00133 | T   | C   | 0.01451 | T   | C   | 0.00212 | T   | C   |
| 666832  | M203 | 12634.0 | A   | G   | 0.00106 | A   | G   | 0.02005 | A   | G   | 0.00152 | A   | G   |
| 666887  | M203 | 12689.0 | T   | C   | 0.00024 | T   | C   | 0.01907 | T   | .   | 0.00000 | T   | C   |
| ...     | ...  | ...     | ... | ... | ...     | ... | ... | ...     | ... | ... | ...     | ... | ... |
| 1975402 | M494 | 11635.0 | C   | T   | 0.09062 | C   | T   | 0.08026 | C   | T   | 0.19712 | C   | T   |
| 2000080 | M494 | 3183.0  | T   | C   | 0.00290 | T   | C   | 0.00177 | T   | C   | 0.04316 | T   | C   |
| 2012839 | M494 | 15948.0 | A   | G   | 0.00127 | A   | G   | 0.00058 | A   | G   | 0.05317 | A   | G   |
| 2046767 | M500 | 204.0   | T   | C   | 0.01199 | T   | C   | 0.00118 | T   | .   | 0.00000 | T   | C   |
| 2046777 | M500 | 214.0   | A   | G   | 0.03514 | A   | G   | 0.00148 | A   | G   | 0.00049 | A   | G   |
| 2067319 | M500 | 4191.0  | A   | G   | 0.00236 | A   | G   | 0.00149 | A   | T   | 0.04714 | A   | T   |
| 2090706 | M500 | 11043.0 | A   | G   | 0.00111 | A   | G   | 0.00111 | A   | G   | 0.01670 | A   | G   |
| 2113750 | M502 | 2706.0  | A   | G   | 0.00067 | A   | G   | 0.00037 | A   | G   | 0.01431 | A   | G   |
| 2156362 | M502 | 12193.0 | A   | G   | 0.01937 | A   | G   | 0.00108 | A   | G   | 0.00148 | A   | G   |
| 2163961 | M512 | 3243.0  | A   | G   | 0.32476 | A   | G   | 0.13995 | G   | A   | 0.31067 | G   | A   |
| 2166255 | M512 | 5539.0  | G   | A   | 0.37990 | G   | A   | 0.19155 | A   | G   | 0.26009 | A   | G   |
| 2179847 | M512 | 2581.0  | A   | G   | 0.01234 | A   | G   | 0.00043 | A   | C   | 0.00045 | A   | G   |
| 2228303 | M513 | 1391.0  | T   | C   | 0.03773 | T   | C   | 0.02549 | T   | C   | 0.00151 | T   | C   |
| 2242245 | M513 | 16235.0 | G   | A   | 0.00788 | G   | A   | 0.01025 | G   | A   | 0.00564 | G   | A   |
| 2245112 | M513 | 2581.0  | A   | G   | 0.02104 | A   | G   | 0.00043 | A   | G   | 0.00114 | A   | G   |
| 2291624 | M520 | 200.0   | G   | A   | 0.02678 | G   | A   | 0.01453 | G   | A   | 0.00431 | G   | A   |
| 2293155 | M520 | 1778.0  | T   | C   | 0.00875 | T   | C   | 0.03364 | T   | C   | 0.00062 | T   | C   |
| 2298590 | M520 | 7221.0  | T   | C   | 0.00309 | T   | C   | 0.01158 | T   | .   | 0.00000 | T   | C   |
| 2307452 | M520 | 16093.0 | T   | C   | 0.15206 | C   | T   | 0.06392 | C   | T   | 0.02813 | C   | T   |
| 2326004 | M520 | 1555.0  | A   | G   | 0.00272 | A   | G   | 0.00172 | A   | G   | 0.01419 | A   | G   |
| 2329629 | M520 | 5181.0  | A   | G   | 0.00020 | A   | G   | 0.00060 | A   | G   | 0.01118 | A   | G   |
| 2382193 | SC8  | 9116.0  | T   | C   | 0.01087 | T   | C   | 0.00843 | T   | C   | 0.00030 | T   | A   |
| 2402442 | SC8  | 13708.0 | G   | A   | 0.00058 | G   | A   | 0.00025 | G   | A   | 0.02488 | G   | A   |
| 2444730 | SC14 | 6683.0  | T   | C   | 0.01268 | T   | C   | 0.00060 | T   | C   | 0.00088 | T   | C   |
| 2488965 | SC16 | 2352.0  | C   | T   | 0.40731 | C   | T   | 0.43130 | C   | T   | 0.21583 | C   | T   |
| 2497760 | SC16 | 11149.0 | G   | A   | 0.02945 | G   | A   | 0.02249 | G   | T   | 0.00015 | G   | A   |

|         |      |         |   |   |         |   |   |         |   |   |         |   |   |
|---------|------|---------|---|---|---------|---|---|---------|---|---|---------|---|---|
| 2502781 | SC16 | 16170.0 | A | G | 0.06300 | A | G | 0.04775 | A | G | 0.00031 | A | . |
| 2503365 | SC16 | 185.0   | A | G | 0.01450 | A | G | 0.00908 | A | G | 0.00182 | A | G |
| 2512743 | SC16 | 9565.0  | G | A | 0.01445 | G | A | 0.01051 | G | A | 0.00095 | G | A |
| 2519899 | SC16 | 152.0   | T | C | 0.00178 | T | C | 0.00059 | T | C | 0.01532 | T | C |

13

|         |         |
|---------|---------|
| 49743   | 0.00215 |
| 80535   | 0.00089 |
| 82828   | 0.00506 |
| 115798  | 0.00019 |
| 140360  | 0.00000 |
| 145325  | 0.00000 |
| 147727  | 0.00036 |
| 191703  | 0.00599 |
| 308891  | 0.06739 |
| 328908  | 0.00013 |
| 330811  | 0.00000 |
| 342450  | 0.00000 |
| 365134  | 0.02330 |
| 366061  | 0.01087 |
| 375236  | 0.02052 |
| 474020  | 0.00044 |
| 507120  | 0.02656 |
| 539922  | 0.00050 |
| 558655  | 0.01555 |
| 589762  | 0.00158 |
| 597746  | 0.00000 |
| 602733  | 0.00049 |
| 623866  | 0.01150 |
| 631050  | 0.02196 |
| 634146  | 0.02859 |
| 649833  | 0.00044 |
| 666023  | 0.00037 |
| 666180  | 0.00183 |
| 666832  | 0.00062 |
| 666887  | 0.00043 |
| ...     | ...     |
| 1975402 | 0.22615 |
| 2000080 | 0.04190 |
| 2012839 | 0.04255 |
| 2046767 | 0.00127 |
| 2046777 | 0.00027 |
| 2067319 | 0.05447 |
| 2090706 | 0.00028 |
| 2113750 | 0.00053 |
| 2156362 | 0.00141 |
| 2163961 | 0.40417 |
| 2166255 | 0.36141 |
| 2179847 | 0.00040 |
| 2228303 | 0.00055 |
| 2242245 | 0.00451 |
| 2245112 | 0.00044 |
| 2291624 | 0.00117 |
| 2293155 | 0.00047 |



```

2298590 0.00126
2307452 0.00672
2326004 0.01572
2329629 0.02127
2382193 0.00017
2402442 0.01640
2444730 0.00049
2488965 0.23353
2497760 0.00025
2502781 0.00000
2503365 0.00053
2512743 0.00046
2519899 0.01251

```

```
[105 rows x 14 columns]
```

```
In [47]: # Set column names
# mc: mother cheek
# mb: mother blood
# cc: child cheek
# cb: child blood
```

```
quartets.columns = ["family", "position", "mcMajor", "mcMinor", "mcMAF", "mbMajor", "mbMinor", "mbMAF",
                   "ccMajor", "ccMinor", "ccMAF", "cbMajor", "cbMinor", "cbMAF"]
```

```
In [48]: quartets.head(2)
```

```
Out[48]:
```

|  | family | position | mcMajor | mcMinor | mcMAF | mbMajor | mbMinor | mbMAF | \       |
|--|--------|----------|---------|---------|-------|---------|---------|-------|---------|
|  | 49743  | M117     | 214.0   | A       | G     | 0.00181 | A       | G     | 0.00043 |
|  | 80535  | M132     | 14461.0 | T       | C     | 0.04461 | T       | C     | 0.04041 |

  

|  | ccMajor | ccMinor | ccMAF | cbMajor | cbMinor | cbMAF |         |
|--|---------|---------|-------|---------|---------|-------|---------|
|  | 49743   | A       | G     | 0.02019 | A       | G     | 0.00215 |
|  | 80535   | T       | C     | 0.00145 | T       | C     | 0.00089 |

We can add even more information to the quartets table. For instance, the impact of the alternative allele and the nucleotide change class:

```
In [49]: # Define function for generating protein translation
```

```
def translate(sequence, gene):
    if len(str(sequence))%3!=0:
        add=3 - (len(str(sequence))%3)
    else:
        add=0

    if genedb[gene]["strand"]==1:
        modseq=str(sequence)+add*'A'
    else:
        modseq=str(sequence.reverse_complement())+add*'A'

    try:
        translation=str(Seq(modseq, IUPAC.unambiguous_dna).translate(table=2, cds=True))
    except:
        translation=[]
```

```

        return translation

In [50]: # Define function for estimating evolutionary impact
# The function determines if a heteroplasmic site
# synonymous/non-synonymous and if the change is transitional or transversional

def evoImpact(quartet):
    try:
        het,major,minor = quartet
        pos = int(het)-1
        gene = [g for g in genedb if genedb[g]['end']>=pos>=genedb[g]['start']][0]

        if gene in [feature.qualifiers['gene'][0] for feature in rCRS.features if feature.type

            majorseq = rCRS.seq.tomutable()
            minorseq = rCRS.seq.tomutable()
            majorseq[pos] = major
            minorseq[pos] = minor
            ref_seq = rCRS.seq[genedb[gene]["start"]:genedb[gene]["end"]]
            major_seq = majorseq[genedb[gene]["start"]:genedb[gene]["end"]]
            minor_seq = minorseq[genedb[gene]["start"]:genedb[gene]["end"]]

            if (translate(ref_seq,gene)==translate(minor_seq,gene)):
                ptimpact = "syn"
            else:
                ptimpact = "nonsyn"
        else:
            ptimpact = "-"

        ntClass={'pu':['A','G'],'py':['C','T']}
        majorClass=[k for k,v in ntClass.iteritems() if major in v]
        minorClass=[k for k,v in ntClass.iteritems() if minor in v]
        if majorClass==minorClass:
            ntimpact='ts'
        else:
            ntimpact='tv'

        return pd.Series([ptimpact,genedb[gene]['class'],ntimpact])

    except:
        pass

In [51]: # Using BioPython rCRS object defined in cell 10
# Parse mitochondrial genome features

genedb = dict()
labs = ["class","start","end","strand"]
for feature in rCRS.features:
    if feature.type in ["rRNA","tRNA","CDS"]:
        ftype = feature.type

```

```

name = feature.qualifiers['gene'][0]
start = int(feature.location.start)
end = int(feature.location.end)
strand = int(feature.location.strand)
genedb[name] = dict(zip(labs, [ftype, start, end, strand]))
genedb['D-loop1'] = dict(zip(labs, ["Dloop", 0, 576, 1]))
genedb['D-loop2'] = dict(zip(labs, ["Dloop", 16023, 16569, 1]))

```

```

In [52]: a = quartets.loc[282115:328908]
a.head(20)
#a[['position', 'mbMajor', 'mbMinor']].apply(evoImpact, axis=1)

```

```

Out[52]:
   family  position  mcMajor  mcMinor  mcMAF  mbMajor  mbMinor  mbMAF \
308891  M188   16240.0      A      G  0.00103      A      G  0.00007
328908  M190    3202.0      T      C  0.01641      T      C  0.01420

   ccMajor  ccMinor  ccMAF  cbMajor  cbMinor  cbMAF
308891      A      G  0.10872      A      G  0.06739
328908      T      C  0.00043      T      C  0.00013

```

```

In [53]: # We set the ancestral state to the alleles found in the mother's blood sample.

```

```

quartets[["ptchange", "class", "ntchange"]] = quartets[['position', 'mbMajor', 'mbMinor']].apply(evoImpact, axis=1)

```

Finalized quartets table:

```

In [54]: quartets.head(2)

```

```

Out[54]:
   family  position  mcMajor  mcMinor  mcMAF  mbMajor  mbMinor  mbMAF \
49743  M117     214.0      A      G  0.00181      A      G  0.00043
80535  M132  14461.0      T      C  0.04461      T      C  0.04041

   ccMajor  ccMinor  ccMAF  cbMajor  cbMinor  cbMAF  ptchange  class \
49743      A      G  0.02019      A      G  0.00215      -  Dloop
80535      T      C  0.00145      T      C  0.00089  nonsyn  CDS

   ntchange
49743      ts
80535      ts

```

### 3.2 Plot the number of heteroplasmic sites per individual or family (Fig. S11)

```

In [55]: # Since we modified the hq_sites dataframe, we have to reload it in R

```

```

%R -i hq_sites,quartets

```

```

In [56]: %%R

```

```

# Adjust value types in the hq_sites dataframe
tonumeric = c(3:13,16:18)
hq_sites[,tonumeric] = apply(hq_sites[,tonumeric], 2, function(x) as.numeric(as.character(x)))
head(hq_sites,2)

```

```

   sample reference position  A  C  G  T  a  c  g  t  cvrg
49743 M117C1-ch   chrM     214 1234  0 22  0 1581  0 36  0 2873
80535 M132-b1    chrM   14461  0 195  0 4356  0 183  0 4620 9354

```

|       | nalleles | major | minor | maf     | sb      | strandBias | mafBalance | poisson      |
|-------|----------|-------|-------|---------|---------|------------|------------|--------------|
| 49743 | 2        | A     | G     | 0.02019 | 0.23517 | 0.2351663  | 1          | 1.109776e-02 |
| 80535 | 2        | T     | C     | 0.04041 | 0.11746 | 0.1174580  | 1          | 4.761880e-06 |

  

|       | family | tissue | member |
|-------|--------|--------|--------|
| 49743 | M117   | cheek  | child  |
| 80535 | M132   | blood  | mother |

In [57]: %%R

```
# Frequency (number of sites per individual)

getFreq = function(data,tissue,member) {

  siteFreq = data.frame(table(table(as.character(data[(data[["tissue"]]==tissue) & (data[["m
  siteFreq = unlist(apply(siteFreq,1,FUN=function(x) rep(x[1],x[2])))
  siteFreq = as.numeric(c(rep(0,39-length(siteFreq)),siteFreq))

  return(siteFreq)
}
```

In [58]: %%R

```
# Size of circles

symbolPlot = function(data,pos) {

  symbols(rep(pos,length(unique(data))),
          sort(unique(data)),circles=(data.frame(table(data))$Freq)*0.01,
          add=T,inches=F,bg="black")
}
```

In [59]: %%R

```
# Backbone boxplot

boxPlotNsites = function(data,pos,addOpt="False"){
  boxplot(data,ylim=c(-2,maxSites),frame=F,axes=F,xlim=c(1,7),at=pos,col=rgb(0,0,0,0),
          boxlwd=2,boxcol="coral3",medcol="coral3",whisklty="solid",whiskcol="coral3",
          staplecol="coral3",add=as.logical(addOpt),outline=F)
}
```

In [60]: %%R -w 11 -h 8 -u in -r 72

```
mc = getFreq(hq_sites,"cheek","mother")
mb = getFreq(hq_sites,"blood","mother")
cc = getFreq(hq_sites,"cheek","child")
cb = getFreq(hq_sites,"blood","child")

fam = data.frame(table(table(quartets[["family"]])))
fam = unlist(apply(fam,1,FUN=function(x) rep(as.numeric(x[1]),x[2])))
fam = as.numeric(c(rep(0,39-length(fam)),fam))
```

```

maxSites = max(c(mc,mb,cc,cb,fam))
par(mar=c(2,2,2,1))
par(oma=c(0,0,0,0))

plot(1:7,1:7,type="n",ylim=c(-2,maxSites),frame=F,axes=F)

symbolPlot(mc,2)
symbolPlot(mb,3)
symbolPlot(cc,4)
symbolPlot(cb,5)
symbolPlot(fam,6)

Lab = c("Maternal \ncheek","Maternal \nblood","Child \ncheek","Child \nblood","Family")

axis(1,at=2:6,lab=Lab,pos=-1.5,las=1,cex.axis=0.8,tck=-0.01)
axis(2,at=0:maxSites,lab=0:maxSites,pos=1,las=2,cex.axis=0.8)
mtext("Number of point heteroplasmies",2,1,cex=0.8,adj=0.7)

par(new=T)
boxPlotNsites(mc,2)
boxPlotNsites(mb,3,"True")
boxPlotNsites(cc,4,"True")
boxPlotNsites(cb,5,"True")
boxPlotNsites(fam,6,"True")

```

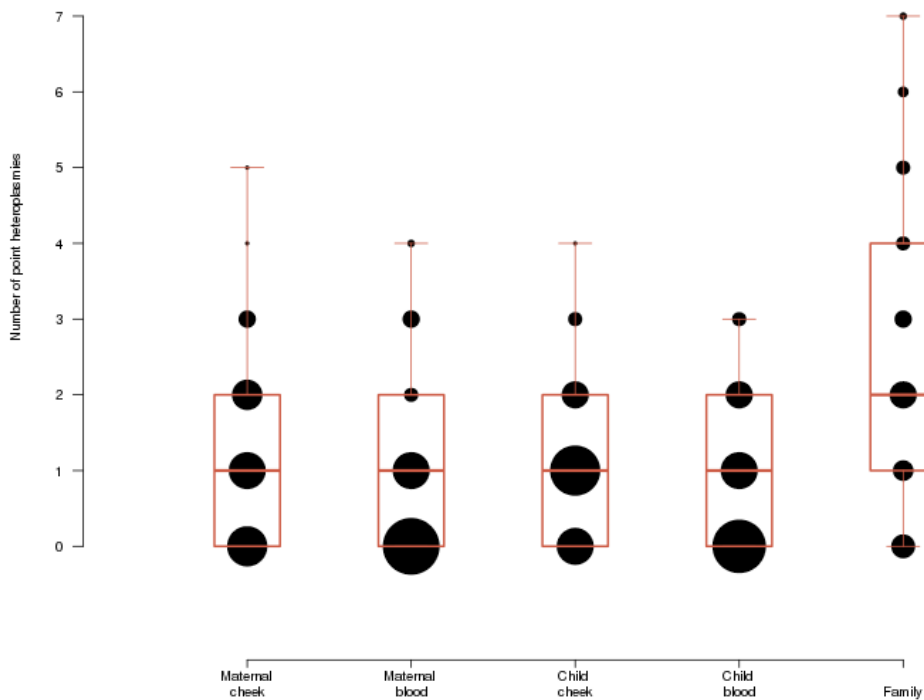

### 3.3 Plot distribution of high quality heteroplasmies (Fig. S10)

In [61]: %%R

```

data = quartets
uniqueFamilies = sort(unique(as.character(data$family)))
faid = cbind(1:length(uniqueFamilies),uniqueFamilies)

plotid=c()
for (s in as.character(data$family)){
  plotid=c(plotid,faid[faid[,2]==s,1])
}
data$id = as.numeric(plotid)
data$position = as.numeric(as.character(data$position))
head(data)

```

|        | family | position | mcMajor | mcMinor | mcMAF   | mbMajor | mbMinor | mbMAF   | ccMajor |
|--------|--------|----------|---------|---------|---------|---------|---------|---------|---------|
| 49743  | M117   | 214      | A       | G       | 0.00181 | A       | G       | 0.00043 | A       |
| 80535  | M132   | 14461    | T       | C       | 0.04461 | T       | C       | 0.04041 | T       |
| 82828  | M132   | 185      | A       | G       | 0.01535 | A       | G       | 0.00569 | A       |
| 115798 | M132   | 64       | C       | T       | 0.00307 | C       | T       | 0.00030 | C       |
| 140360 | M137   | 8953     | A       | .       | 0.00000 | A       | G       | 0.01451 | A       |
| 145325 | M137   | 13918    | T       | C       | 0.00105 | T       | C       | 0.01591 | T       |

```

ccMinor  ccMAF  cbMajor  cbMinor  cbMAF  ptchange  class  ntchange  id
49743    G 0.02019    A    G 0.00215    - Dloop    ts    1
80535    C 0.00145    T    C 0.00089  nonsyn  CDS    ts    2
82828    G 0.00522    A    G 0.00506    - Dloop    ts    2
115798   T 0.01945    C    T 0.00019    - Dloop    ts    2
140360   T 0.00037    A    . 0.00000  nonsyn  CDS    ts    3
145325   . 0.00000    T    . 0.00000  nonsyn  CDS    ts    3

```

In [62]: %%R

```

# Define colors for each mitochondrial genome features

alp =200
trna ="blue"
rrna ="lightseagreen"
prot ="orange"
dloop="red"

colors=c()
for (c in data[["class"]]) if (c=="Dloop") {
  colors=c(colors,dloop)
} else if (c=="tRNA") {
  colors=c(colors,trna)
} else if (c=="rRNA") {
  colors=c(colors,rrna)
} else {
  colors=c(colors,prot)
}

```

```

}
data$colors=colors

```

In [63]: %%R

```

# Define symbols depending on whether a site is syn/nonsyn or ts/tv

symbol=c()
for (i in 1:nrow(data)){
  if (data[["ntchange"]][i]=="tv" & data[["ptchange"]][i]=="nonsyn") {symbol=c(symbol,17)}
  } else if (data[["ntchange"]][i]=="tv" & data[["ptchange"]][i]!="nonsyn") {symbol=c(symbol,18)}
  } else if (data[["ptchange"]][i]=="syn") {
    symbol=c(symbol,16)
  } else {
    symbol=c(symbol,1)}
}
data$symbol=symbol

```

In [64]: %%R -w 5 -h 4 -u in -r 144

```

# Plot area
par(mar=c(2,2,2,1))
par(oma=c(0,0,0,0))
par(las=2)
plot(data$position,data$id*5+5,xlim=c(1,16569), ylim=c(-80,170),frame="False",ylab="",axes=F,

# Grid
for (i in data$id) {segments(1,i*5+5,16569,i*5+5,col="grey90")}
for (i in c(1,seq(500,16500,500))) {segments(i,5,i,162,col="grey90")}
for (i in seq(500,16500,1000)) {text(i,163,lab=i,col="black",cex=0.25)}
mtext("Family",3,-1.2,las=1,adj=-0.07,cex=0.5)
mtext("coord:",3,-1.35,las=1,adj=0.01,cex=0.3)

# Actual plot
points(data$position,data$id*5+5,xlim=c(1,16569), ylim=c(-80,170),pch=data$symbol,ylab="",col=

# Axes
abline(h=5)
lab=unique(data[,c(1,18)])
axis(2,pos=-500,at=sort(unique(data$id*5+5)),labels=lab[order(lab$id),][,1],cex.axis=0.4)

# Legend
legend(1,180,legend=c("D-loop","tRNA","rRNA","cds-syn","cds-nonSyn","transversion"),
      fill=c(NA,NA,NA,NA,NA,NA),border=c(rep("white",4),NA,NA),pch=c(1,1,1,1,16,2),
      col=c(dloop,trna,rrna,prot,prot,"black"),cex=0.5,bty="n",pt.cex=0.7,horiz=T,
      x.intersp=c(0.7,0.7,0.7,0.7,0.7,1),text.width=1350)

# mtDNA genes
Arrows(1,0,576,0,arr.length=0.05,arr.type='simple')
text(576,0,labels='DLOOP',cex=0.5,pos=4)
Arrows(576,-5,647,-5,arr.length=0.05,arr.type='simple')
text(647,-5,labels='TRNF',cex=0.5,pos=4)
Arrows(647,-10,1601,-10,arr.length=0.05,arr.type='simple')

```

```

text(1601,-10,labels='RNR1',cex=0.5,pos=4)
Arrows(1601,-15,1670,-15,arr.length=0.05,arr.type='simple')
text(1670,-15,labels='TRNV',cex=0.5,pos=4)
Arrows(1670,-20,3229,-20,arr.length=0.05,arr.type='simple')
text(3229,-20,labels='RNR2',cex=0.5,pos=4)
Arrows(3229,-25,3304,-25,arr.length=0.05,arr.type='simple')
text(3304,-25,labels='TRNL1',cex=0.5,pos=4)
Arrows(3306,-30,4262,-30,arr.length=0.05,arr.type='simple')
text(4262,-30,labels='ND1',cex=0.5,pos=4)
Arrows(4262,-35,4331,-35,arr.length=0.05,arr.type='simple')
text(4331,-35,labels='TRNI',cex=0.5,pos=4)
Arrows(4328,-40,4400,-40,arr.length=0.05,code=1,arr.type='simple')
text(4400,-40,labels='TRNQ',cex=0.5,pos=4)
Arrows(4401,-45,4469,-45,arr.length=0.05,arr.type='simple')
text(4469,-45,labels='TRNM',cex=0.5,pos=4)
Arrows(4469,-50,5511,-50,arr.length=0.05,arr.type='simple')
text(5511,-50,labels='ND2',cex=0.5,pos=4)
Arrows(5511,-55,5579,-55,arr.length=0.05,arr.type='simple')
text(5579,-55,labels='TRNW',cex=0.5,pos=4)
Arrows(5586,-60,5655,-60,arr.length=0.05,code=1,arr.type='simple')
text(5655,-60,labels='TRNA',cex=0.5,pos=4)
Arrows(5656,-65,5729,-65,arr.length=0.05,code=1,arr.type='simple')
text(5729,-65,labels='TRNN',cex=0.5,pos=4)
Arrows(5760,-70,5826,-70,arr.length=0.05,code=1,arr.type='simple')
text(5826,-70,labels='TRNC',cex=0.5,pos=4)
Arrows(5825,-75,5891,-75,arr.length=0.05,code=1,arr.type='simple')
text(5891,-75,labels='TRNY',cex=0.5,pos=4)
Arrows(5903,-5,7445,-5,arr.length=0.05,arr.type='simple')
text(7445,-5,labels='COX1',cex=0.5,pos=4)
Arrows(7445,-10,7514,-10,arr.length=0.05,code=1,arr.type='simple')
text(7514,-10,labels='TRNS1',cex=0.5,pos=4)
Arrows(7517,-15,7585,-15,arr.length=0.05,arr.type='simple')
text(7585,-15,labels='TRND',cex=0.5,pos=4)
Arrows(7585,-20,8269,-20,arr.length=0.05,arr.type='simple')
text(8269,-20,labels='COX2',cex=0.5,pos=4)
Arrows(8294,-25,8364,-25,arr.length=0.05,arr.type='simple')
text(8364,-25,labels='TRNK',cex=0.5,pos=4)
Arrows(8365,-30,8572,-30,arr.length=0.05,arr.type='simple')
text(8572,-30,labels='ATP8',cex=0.5,pos=4)
Arrows(8526,-35,9207,-35,arr.length=0.05,arr.type='simple')
text(9207,-35,labels='ATP6',cex=0.5,pos=4)
Arrows(9206,-40,9990,-40,arr.length=0.05,arr.type='simple')
text(9990,-40,labels='COX3',cex=0.5,pos=4)
Arrows(9990,-45,10058,-45,arr.length=0.05,arr.type='simple')
text(10058,-45,labels='TRNG',cex=0.5,pos=4)
Arrows(10058,-50,10404,-50,arr.length=0.05,arr.type='simple')
text(10404,-50,labels='ND3',cex=0.5,pos=4)
Arrows(10404,-55,10469,-55,arr.length=0.05,arr.type='simple')
text(10469,-55,labels='TRNR',cex=0.5,pos=4)
Arrows(10469,-5,10766,-5,arr.length=0.05,arr.type='simple')
text(10766,-5,labels='ND4L',cex=0.5,pos=4)
Arrows(10759,-10,12137,-10,arr.length=0.05,arr.type='simple')
text(12137,-10,labels='ND4',cex=0.5,pos=4)
Arrows(12137,-15,12206,-15,arr.length=0.05,arr.type='simple')

```



```

text(12206,-15,labels='TRNH',cex=0.5,pos=4)
Arrows(12206,-20,12265,-20,arr.length=0.05,arr.type='simple')
text(12265,-20,labels='TRNS2',cex=0.5,pos=4)
Arrows(12265,-25,12336,-25,arr.length=0.05,arr.type='simple')
text(12336,-25,labels='TRNL2',cex=0.5,pos=4)
Arrows(12336,-30,14148,-30,arr.length=0.05,arr.type='simple')
text(14148,-30,labels='ND5',cex=0.5,pos=4)
Arrows(14148,-35,14673,-35,arr.length=0.05,code=1,arr.type='simple')
text(14673,-35,labels='ND6',cex=0.5,pos=4)
Arrows(14673,-40,14742,-40,arr.length=0.05,code=1,arr.type='simple')
text(14742,-40,labels='TRNE',cex=0.5,pos=4)
Arrows(14746,-45,15887,-45,arr.length=0.05,arr.type='simple')
text(15887,-45,labels='CYTB',cex=0.5,pos=4)
Arrows(15887,-50,15953,-50,arr.length=0.05,arr.type='simple')
text(15953,-50,labels='TRNT',cex=0.5,pos=4)
Arrows(15955,-55,16023,-55,arr.length=0.05,code=1,arr.type='simple')
text(16023,-55,labels='TRNP',cex=0.5,pos=4)
Arrows(16024,0,16569,0,arr.length=0.05,arr.type='simple')
text(16024,0,labels='DLOOP',cex=0.5,pos=2)

```

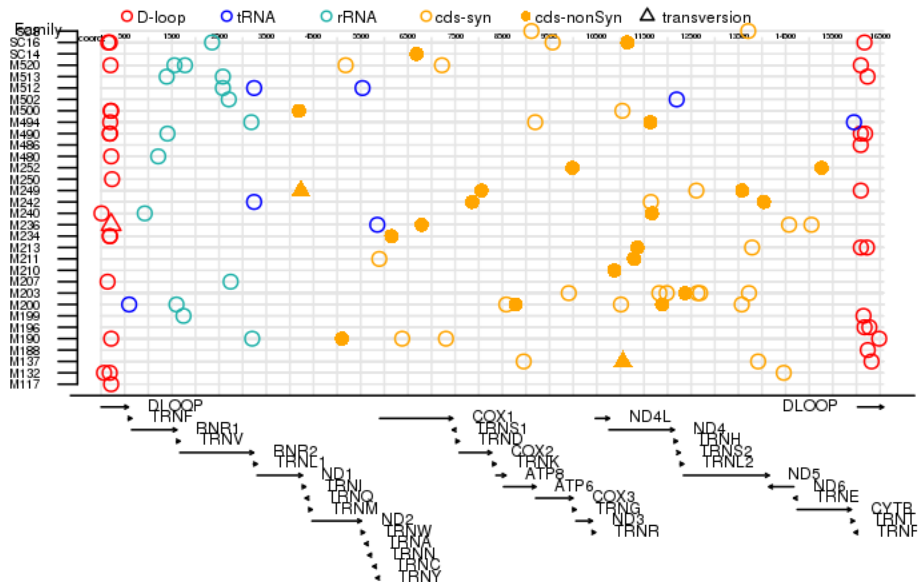

### 3.4 Plot correlations in minor allele frequencies (Fig. 1)

```

In [65]: %%R
#head(quartets,3)
quartets[as.character(quartets$cbMinor) != as.character(quartets$ccMinor),]

family position mcMajor mcMinor mcMAF mbMajor mbMinor mbMAF ccMajor

```

|         |         |         |         |         |         |          |       |          |   |
|---------|---------|---------|---------|---------|---------|----------|-------|----------|---|
| 140360  | M137    | 8953    | A       | .       | 0.00000 | A        | G     | 0.01451  | A |
| 147727  | M137    | 16320   | C       | T       | 0.26120 | C        | T     | 0.05245  | C |
| 342450  | M190    | 215     | A       | G       | 0.08234 | A        | G     | 0.00097  | A |
| 597746  | M200    | 8584    | G       | A       | 0.00541 | G        | A     | 0.01516  | G |
| 602733  | M200    | 13571   | C       | T       | 0.01600 | C        | T     | 0.01060  | C |
| 666887  | M203    | 12689   | T       | C       | 0.00024 | T        | C     | 0.01907  | T |
| 788952  | M207    | 2746    | T       | C       | 0.20339 | T        | C     | 0.23444  | T |
| 1193442 | M236    | 14573   | A       | G       | 0.30872 | A        | G     | 0.30129  | A |
| 1244595 | M240    | 926     | A       | G       | 0.04277 | A        | G     | 0.05453  | A |
| 1302356 | M240    | 11668   | C       | T       | 0.00028 | C        | T     | 0.00041  | C |
| 1718621 | M480    | 1211    | G       | A       | 0.02484 | G        | A     | 0.01028  | G |
| 1833848 | M490    | 1407    | T       | C       | 0.00705 | T        | C     | 0.01344  | T |
| 2046767 | M500    | 204     | T       | C       | 0.01199 | T        | C     | 0.00118  | T |
| 2179847 | M512    | 2581    | A       | G       | 0.01234 | A        | G     | 0.00043  | A |
| 2298590 | M520    | 7221    | T       | C       | 0.00309 | T        | C     | 0.01158  | T |
| 2382193 | SC8     | 9116    | T       | C       | 0.01087 | T        | C     | 0.00843  | T |
| 2497760 | SC16    | 11149   | G       | A       | 0.02945 | G        | A     | 0.02249  | G |
| 2502781 | SC16    | 16170   | A       | G       | 0.06300 | A        | G     | 0.04775  | A |
|         | ccMinor | ccMAF   | cbMajor | cbMinor | cbMAF   | ptchange | class | ntchange |   |
| 140360  | T       | 0.00037 | A       | .       | 0.00000 | nonsyn   | CDS   | ts       |   |
| 147727  | .       | 0.00000 | C       | T       | 0.00036 | -        | Dloop | ts       |   |
| 342450  | G       | 0.00122 | A       | .       | 0.00000 | -        | Dloop | ts       |   |
| 597746  | A       | 0.00064 | G       | .       | 0.00000 | nonsyn   | CDS   | ts       |   |
| 602733  | .       | 0.00000 | C       | T       | 0.00049 | nonsyn   | CDS   | ts       |   |
| 666887  | .       | 0.00000 | T       | C       | 0.00043 | nonsyn   | CDS   | ts       |   |
| 788952  | A       | 0.00031 | T       | C       | 0.00012 | -        | rRNA  | ts       |   |
| 1193442 | .       | 0.00000 | A       | G       | 0.00026 | nonsyn   | CDS   | ts       |   |
| 1244595 | G       | 0.00034 | A       | .       | 0.00000 | -        | rRNA  | ts       |   |
| 1302356 | T       | 0.01888 | C       | .       | 0.00000 | syn      | CDS   | ts       |   |
| 1718621 | A       | 0.00007 | G       | .       | 0.00000 | -        | rRNA  | ts       |   |
| 1833848 | C       | 0.00034 | T       | .       | 0.00000 | -        | rRNA  | ts       |   |
| 2046767 | .       | 0.00000 | T       | C       | 0.00127 | -        | Dloop | ts       |   |
| 2179847 | C       | 0.00045 | A       | G       | 0.00040 | -        | rRNA  | ts       |   |
| 2298590 | .       | 0.00000 | T       | C       | 0.00126 | nonsyn   | CDS   | ts       |   |
| 2382193 | C       | 0.00030 | T       | A       | 0.00017 | nonsyn   | CDS   | ts       |   |
| 2497760 | T       | 0.00015 | G       | A       | 0.00025 | syn      | CDS   | ts       |   |
| 2502781 | G       | 0.00031 | A       | .       | 0.00000 | -        | Dloop | ts       |   |

There are a few cases of reversal of mminor allele frequencies between two tissues of the same individual, or between a mother and her child. Consequently, it is necessary to fix the “ancestral” allele, and we arbitrarily decided to use the maternal blood as the ancestral state.

In [66]: %%R

```
# mb = maternal blood
# mc = maternal cheek
# cb = child blood
# cc = child cheek

adjustMAF = function(row){
  mbMajor = row[["mbMajor"]]

```

```

mbMinor = row[["mbMinor"]]
mcMajor = row[["mcMajor"]]
mcMinor = row[["mcMinor"]]
ccMajor = row[["ccMajor"]]
ccMinor = row[["ccMinor"]]
cbMajor = row[["cbMajor"]]
cbMinor = row[["cbMinor"]]

if ((c(mbMajor,mbMinor) == c(mcMinor,mcMajor)) & (mcMinor!=".")){
  mcMAFadj = 1 - as.numeric(row[["mcMAF"]])
}else{
  mcMAFadj = as.numeric(row[["mcMAF"]])
}

if ((c(mbMajor,mbMinor) == c(ccMinor,ccMajor)) & (ccMinor!=".")){
  ccMAFadj = 1 - as.numeric(row[["ccMAF"]])
}else{
  ccMAFadj = as.numeric(row[["ccMAF"]])
}

if ((c(mbMajor,mbMinor) == c(cbMinor,cbMajor)) & (cbMinor!=".")){
  cbMAFadj = 1 - as.numeric(row[["cbMAF"]])
}else{
  cbMAFadj = as.numeric(row[["cbMAF"]])
}

return(c(mcMAFadj,ccMAFadj,cbMAFadj))
}

```

In [67]: `%%R`

```

adjustedMAF = data.frame(t(apply(quartets, 1, adjustMAF)))
colnames(adjustedMAF) = c("mc","cc","cb")

head(adjustedMAF,2)

```

|       | mc      | cc      | cb      |
|-------|---------|---------|---------|
| 49743 | 0.00181 | 0.02019 | 0.00215 |
| 80535 | 0.04461 | 0.00145 | 0.00089 |

Due to the adjustment of MAF based on the maternal state, comparing the child tissues independently of the mother's, require an additional adjustment.

In [68]: `%%R`

```

ccx=c()
for (maf in adjustedMAF$cc) {if (maf>0.5) ccx=c(ccx,(1-maf)) else ccx=c(ccx,maf)}
cbx=c()
for (maf in adjustedMAF$cb) {if (maf>0.5) cbx=c(cbx,(1-maf)) else cbx=c(cbx,maf)}

```

In [69]: `%%R`

```

xyplot = function(x,y,sub,xtissue,ytissue,case){

  xLab = paste("het. allele frequency (",xtissue,")",sep="")
  yLab = paste("het. allele frequency (",ytissue,")",sep="")

  plot(x,y,pch=20,col="#00000078",axes=F,xlab=xLab,
       ylab=yLab,cex.lab=0.85,cex=2,xlim=c(0,1),ylim=c(0,1))

  abline(lm(x~y), col="darkgrey",lwd=1)
  mylabel = bquote(italic(R)^2 == .(round(summary(lm(x~y))$r.squared,2)))

  text(-0.05,0.7, pos=4,labels=mylabel,font=2,cex=1)
  text(-0.05,0.9,labels=case,cex=1,pos=4)
  mtext(sub,3,0.5,at=0,cex=1,font=1)
  axis(1,at=c(0,0.5,1))
  axis(2,at=c(0,0.5,1))
}

```

In [70]: %%R -w 4 -h 4 -u in -r 144

```

par(mfrow=c(2,2))
par(oma=c(0,0,0,0))
par(mar=c(3,2.5,2,1))

par(mgp=c(1.5,0.25,0.25))
par(tck=-0.05)

xyplot(ccx,cbx,"A","cheek","blood","CHILD")
xyplot(adjustedMAF$mc,quartets$mbMAF,"B","cheek","blood","MOTHER")
xyplot(adjustedMAF$mc,ccx,"C","mother","child","CHEEK")
xyplot(quartets$mbMAF,cbx,"D","mother","child","BLOOD")

```

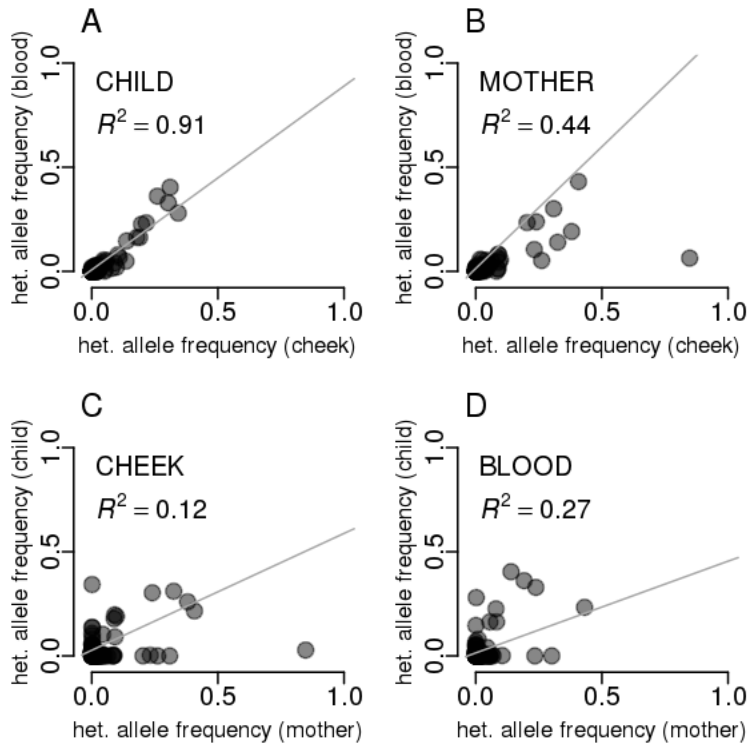

### 3.5 Plot the bottleneck size (Fig. S15)

In [71]: %%R

```
# We calculated the bottleneck size by comparing
# the allele frequency of the minor allele in the mother and her child
```

```
bottleneckData = data.frame(
  mc=adjustedMAF$mc,
  mb=quartets[["mbMAF"]],
  cc=adjustedMAF$cc,
  cb=adjustedMAF$cb)
```

```
# We used the average of the two tissues in an individual
```

```
bottleneckData[["meanM"]] = apply(bottleneckData[,1:2], 1,mean)
bottleneckData[["meanC"]] = apply(bottleneckData[,3:4], 1,mean)
```

```
# And modeled the bottleneck as in Millar et al, 2008
```

```
bottleneckData$b1 = (bottleneckData$meanM*(1-bottleneckData$meanM))/(bottleneckData$meanC-bot
bottleneckData$b1.cheek = (bottleneckData$mc*(1-bottleneckData$mc))/(bottleneckData$mc-bottlen
bottleneckData$b1.blood = (bottleneckData$mb*(1-bottleneckData$mb))/(bottleneckData$mb-bottlen
```

```
# Select cases where there is evidence of the minor allele in the maternal lineage (i.e. the mi
# both tissues of the mother, at least 1% in one of the tissues, and 0.2% in the other tissue)
```

```
bn1.m = bottleneckData[(bottleneckData$mc>=0.01|bottleneckData$mb>=0.01) &
                        (bottleneckData$mc>=0.002 & bottleneckData$mb>=0.002),][["bn1"]]

bn1.cheek = bottleneckData[bottleneckData$mc>=0.01,][["bn1.cheek"]]
bn1.blood = bottleneckData[bottleneckData$mb>=0.01,][["bn1.blood"]]
```

```
In [72]: %%R
length(bn1.m)
```

```
[1] 50
```

```
In [73]: %%R
```

```
# Accounting for mitotic segregation
```

```
mitotic = function(row){
  mc = row[1]
  mb = row[2]
  cc = row[3]
  cb = row[4]
  variance = ((mc-cc)^2+(mc-cb)^2+(mb-cc)^2+(mb-cb)^2-2*(mc-mb)^2-2*(cc-cb)^2)/4
  return(variance)
}
```

```
bottleneckData[["mitotvar"]] = apply(bottleneckData,1,mitotic)
bottleneckData$bn2 = (bottleneckData$meanM*(1-bottleneckData$meanM))/(bottleneckData$mitotvar)
bn2.m = bottleneckData[(bottleneckData$mc>=0.01|bottleneckData$mb>=0.01) &
                        (bottleneckData$mc>=0.002 & bottleneckData$mb>=0.002),][["bn2"]]
```

```
In [74]: %%R
```

```
# We removed negative or indetermined estimates of the bottleneck
```

```
bn2.m = bn2.m[bn2.m>0]
```

```
In [75]: %%R
length(bn2.m)
```

```
[1] 45
```

```
In [76]: %%R
```

```
bn1.m
```

```
[1] 23.816855 359.631901 5.388898 66.758429 23.645718
[6] 26.075053 107.006629 5.081444 102.508491 76.998633
[11] 103.069255 23.161960 66.648376 3.575002 5.999405
[16] 4576.759055 87.090388 7.145162 543.823984 681.303195
```

|      |              |           |            |            |            |
|------|--------------|-----------|------------|------------|------------|
| [21] | 2.280578     | 30.658853 | 19.692368  | 286.394261 | 12.206464  |
| [26] | 20.436016    | 10.789702 | 56.171303  | 99.896336  | 68.929415  |
| [31] | 10199.573616 | 81.633597 | 162.572697 | 20.286884  | 31.950263  |
| [36] | 4.906696     | 1.059908  | 1.253351   | 32.734057  | 564.244306 |
| [41] | 63.027094    | 48.650744 | 161.959066 | 1.290042   | 107.814053 |
| [46] | 6.428074     | 38.090392 | 17.154591  | 103.400598 | 88.887083  |

In [77]: %%R

```
# Get the actual stats before transforming the data
data_tmp=list(bn1.m,bn2.m)
medians=c()
first=c()
third=c()

for (i in 1:2){
  medians=c(medians,median(unlist(data_tmp[i])))
  first=c(first,summary(unlist(data_tmp[i]))[2])
  third=c(third,summary(unlist(data_tmp[i]))[5])
}

bn1.m = log10(bn1.m)
bn2.m = log10(bn2.m)
```

In [78]: %%R -w 6 -h 5 -u in -r 144

```
par(oma=c(0,0,4,0))
par(bty="n")
par(xpd=TRUE)
par(lwd=1.5)
par(pch=20)

# blank boxplot
boxplot(bn1.m,xlim=c(0,5),ylim=c(-1,3),at=1,frame=F,axes=F,
        ylab="",medcol="white",whiskcol="white",boxcol="white",staplecol="white")

# actual drawings
vioplot(bn1.m,ylim=c(-1,3),at=1,col="royalblue",add=T,border=NA)
vioplot(bn2.m,ylim=c(-1,3),at=2,col="tomato",add=T,border=NA,outline=F)

# y-axis
axis(2,at=seq(0,4,1),lab=seq(0,4,1),pos=0,las=2,lwd=1.5,cex.axis=1.5)

# labs
labx = expression(paste("N=", "p(1-p)/", sigma**2, "" [gen]))
laby = expression(paste("log" [10], "(N)"))
mtext(laby,2,1,cex=1.5,adj=1)
legend(3,4,legend=c(labx,"Mitot. Segreg."),fill=c("royalblue","tomato"),bty="n",border="white")

# Add boxplot stats to vioplot
```

```

data_tmp=list(bn1.m, bn2.m)

for (i in c(1,2)) {
  y=round(median(unlist(data_tmp[i])),2)
  text(i+0.175,y,lab=round(medians[i],1),col="white",cex=0.7,font=2)
  y=round(summary(unlist(data_tmp[i]))[2],2)
  text(i,y,lab=round(first[i],1),col="white",cex=0.7,font=2)
  y=round(summary(unlist(data_tmp[i]))[5],2)
  text(i,y,lab=round(third[i],1),col="white",cex=0.7,font=2)
}

```

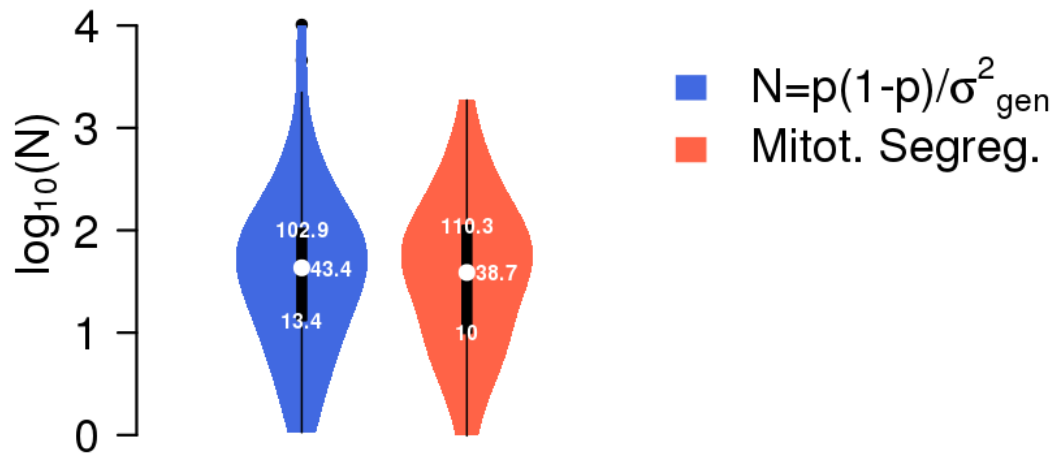

### 3.6 Plot age correlations (Fig. 2)

In [79]: %%R

```

countHq = function(row){
  cheek = row[1]
  blood = row[2]
  if(cheek>=0.01|blood>=0.01){
    return(1)
  }else{

```



```

        return(0)
    }
}

```

In [80]: %%R

```

# count the number of heteroplasmic sites with MAF ≥ 1% (in either tissue) per individual
data = quartets

data$Nmother = apply(quartets[,c(5,8)],1,FUN=countHq)
data$Nchild = apply(quartets[,c(11,14)],1,FUN=countHq)
nsites = aggregate(cbind(Nmother,Nchild) ~ family, data=data,FUN=sum)

```

In [81]: %%R

```
head(nsites)
```

```

family Nmother Nchild
1  M117      0      1
2  M132      2      1
3  M137      3      1
4  M188      0      1
5  M190      3      3
6  M196      1      1

```

In [82]: %%R -i sampAges

```
colnames(sampAges) = c("mother","motherAgeCollection","child","childAgeCollection")
```

In [83]: %%R

```

# age in days
head(sampAges)

```

```

mother motherAgeCollection  child childAgeCollection
0  M132          16658 M132C1          7460
1  M137          14294 M137C2          6202
2  M186          15938 M186C2          3504
3  M188          17714 M188C2          3451
4  M190          18761 M190C2          5866
5  M195          11826 M195C1          2752

```

In [84]: %%R

```
ageEffect = merge(nsites,sampAges,by.x="family",by.y="mother", all.y=TRUE)
```

```

# for samples without heteroplasmic sites, merging produces NAs, so we transformed them to zero
ageEffect[is.na(ageEffect)] = 0

```

In [85]: %%R

```

# the age of the mother at the time of conception of the child is assumed to be
# the current age of the mother, less the current age of the child, less nine months (in days)
ageEffect[["motherAgeFertilization"]] = ageEffect[["motherAgeCollection"]] - (ageEffect[["childAgeCollection"]] - 270)

```

```
In [86]: %%R -w 4 -h 4 -u in -r 144
```

```
# colors
black = "black"
m_col = "royalblue1"
c_col = "tomato1"

# transparent colors
mother = rgb(matrix(col2rgb(m_col),1,3),alpha=120,maxColorValue=255)
child = rgb(matrix(col2rgb(c_col),1,3),alpha=120,maxColorValue=255)
borders = c(m_col,c_col)

# plot margins
par(oma=c(0,0,0,0))
par(mar=c(0.5,2.1,0,0))

# Mother data only
d = ageEffect[,c("Nmother","motherAgeCollection")]
plot(1:10,1:10,xlim=c(15,60),ylim=c(-1.5,5),type="n",frame=F,axes=F,xlab="",ylab="",main="")

points(d[["motherAgeCollection"]]/365,d[["Nmother"]],pch=23,col=borders[1],lwd=1,cex=1,bg=mother)
r3=glm(Nmother~motherAgeCollection,data=d,family="poisson")
p3=round(summary(r3)$coefficients[2,4],3)
fit3=data.frame(age=r3$data$motherAgeCollection/365,f=r3$fitted.values)
fit3=fit3[order(fit3$age),]
lines(fit3$age,fit3$f,col=m_col,lwd=2.5)
x1=min(fit3$age)
x2=max(fit3$age)
pmother=round(summary(r3)$coefficients[2,4],2)

# Child data only
par(new=T)
c = ageEffect[,c("Nchild","motherAgeFertilization")]
points(c[["motherAgeFertilization"]]/365,c[["Nchild"]],pch=21,col=borders[2],bg=child,lwd=1,cex=1)
r3=glm(Nchild~motherAgeFertilization,data=c,family="poisson")
fit3=data.frame(con=r3$data$motherAgeFertilization/365,f=r3$fitted.values)
fit3=fit3[order(fit3$con),]
lines(fit3$con,fit3$f,col=c_col,lwd=2.5)
pchild=round(summary(r3)$coefficients[2,4],3)

# labs
axis(side=1,at=seq(15,60,by=5),lab=NA,lwd=2,pos=-0.25,cex.axis=0.75)
axis(side=2,at=0:5,lwd=2,pos=14.5,las=2,cex.axis=0.75)
mtext("number of point heteroplasmies",2,1.3,at=2.5,cex=0.75,font=2)
mtext("maternal age (years)",1,-0.5,cex=0.75,font=2)
for (i in seq(15,60,by=5)){text(i,-0.75,lab=i,cex=0.75)}

M=paste(paste("mother","p=",sep=" "),pmother,sep="")
C=paste(paste("child","p=",sep=" "),pchild,sep="")
legend(15,4.6,legend=c(M,C),col=borders,
      pt.bg=c(mother,child),pch=c(23,21),pt.cex=1.2,pt.lwd=1.2,
      cex=0.6,title="Poisson model",box.col="gray",box.lwd=1.5,bg=NA)
```

```

x3=min(fit3$con)
x4=max(fit3$con)

lines(c(x1,x2),c(-1,-1),lwd=1.5,col=m_col)
lines(c(x3,x4),c(-1.1,-1.1),lwd=1.5,col=c_col)
mtext("fertilization",1,-1.25,at=27,cex=0.75,col=c_col,font=2)
mtext("collection",1,-1.25,at=45,cex=0.75,col=m_col,font=2)

```

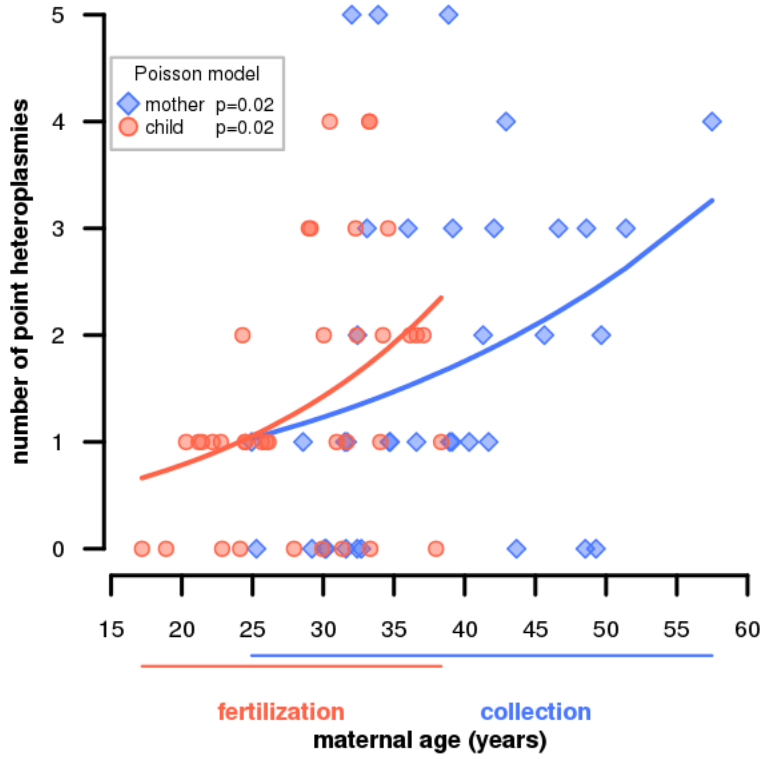

In [ ]:
